# Supplementary material for: Network Pharmacology-Based Strategy Reveals the Effects of Hedysarum multijugum Maxim.-Radix Salviae Compound on Oxidative Capacity and Cardiomyocyte Apoptosis in Rats with Diabetic Cardiomyopathy
Source: Biomed Res Int. 2020 Oct 17;2020:8260703. doi: 10.1155/2020/8260703 (PMC7591987; doi:10.1155/2020/8260703)
Supplement: Supplementary 1 — Table S1: compound targets for each compound. [file 8260703.f1.xlsx]

## Sheet: Sheet1
Table S1 Compound targets for each compounds
Compounds	Compounds Targets
(-)-catechin	ABL1
(-)-catechin	ABO
(-)-catechin	ACADM
(-)-catechin	ACAT1
(-)-catechin	ACPP
(-)-catechin	ADAM17
(-)-catechin	ADAM33
(-)-catechin	ADH
(-)-catechin	ADH1C
(-)-catechin	ADK
(-)-catechin	AGXT
(-)-catechin	AHCY
(-)-catechin	AKR1B1
(-)-catechin	AKR1C1
(-)-catechin	AKR1C2
(-)-catechin	AKR1C3
(-)-catechin	AKT1
(-)-catechin	ALB
(-)-catechin	ALDH2
(-)-catechin	ALDOA
(-)-catechin	AMD1
(-)-catechin	AMY1A
(-)-catechin	AMY1B
(-)-catechin	AMY1C
(-)-catechin	AMY2A
(-)-catechin	ANG
(-)-catechin	APRT
(-)-catechin	AR
(-)-catechin	ARG1
(-)-catechin	ARG2
(-)-catechin	ARHGAP1
(-)-catechin	ARSA
(-)-catechin	ATOX1
(-)-catechin	AURKA
(-)-catechin	AZGP1
(-)-catechin	B3GAT1
(-)-catechin	BACE1
(-)-catechin	BAG1
(-)-catechin	BCAT2
(-)-catechin	BCHE
(-)-catechin	BHMT
(-)-catechin	BIRC7
(-)-catechin	BRAF
(-)-catechin	BST1
(-)-catechin	CA1
(-)-catechin	CA12
(-)-catechin	CA2
(-)-catechin	CASP1
(-)-catechin	CASP3
(-)-catechin	CBR1
(-)-catechin	CBS
(-)-catechin	CCL5
(-)-catechin	CCNA2
(-)-catechin	CD1A
(-)-catechin	CD209
(-)-catechin	CDA
(-)-catechin	CDC42
(-)-catechin	CDK2
(-)-catechin	CDK5R1
(-)-catechin	CDK6
(-)-catechin	CES1
(-)-catechin	CFB
(-)-catechin	CFD
(-)-catechin	CHEK1
(-)-catechin	CHIT1
(-)-catechin	CLK1
(-)-catechin	CMA1
(-)-catechin	CRABP2
(-)-catechin	CRAT
(-)-catechin	CSNK1G2
(-)-catechin	CSNK2A1
(-)-catechin	CTNNA1
(-)-catechin	CTSB
(-)-catechin	CTSF
(-)-catechin	CTSK
(-)-catechin	CTSL
(-)-catechin	CTSS
(-)-catechin	CYP19A1
(-)-catechin	CYP2C9
(-)-catechin	DCK
(-)-catechin	DHFR
(-)-catechin	DHODH
(-)-catechin	DPEP1
(-)-catechin	DPP4
(-)-catechin	DTYMK
(-)-catechin	DUSP6
(-)-catechin	EEA1
(-)-catechin	EGFR
(-)-catechin	EIF4E
(-)-catechin	ELANE
(-)-catechin	EPHA2
(-)-catechin	EPHB4
(-)-catechin	EPHX2
(-)-catechin	ERBB4
(-)-catechin	ESR1
(-)-catechin	ESR2
(-)-catechin	ESRRG
(-)-catechin	F10
(-)-catechin	F2
(-)-catechin	F7
(-)-catechin	FABP3
(-)-catechin	FABP4
(-)-catechin	FABP6
(-)-catechin	FDPS
(-)-catechin	FECH
(-)-catechin	FGFR1
(-)-catechin	FKBP1A
(-)-catechin	FKBP1B
(-)-catechin	FNTA
(-)-catechin	GALE
(-)-catechin	GART
(-)-catechin	GBA
(-)-catechin	GCK
(-)-catechin	GLTP
(-)-catechin	GMPR
(-)-catechin	GNPDA1
(-)-catechin	GNPDA2
(-)-catechin	GP1BA
(-)-catechin	GPI
(-)-catechin	GSK3B
(-)-catechin	GSR
(-)-catechin	GSTA1
(-)-catechin	GSTA3
(-)-catechin	GSTM1
(-)-catechin	GSTM2
(-)-catechin	GSTO1
(-)-catechin	GSTP1
(-)-catechin	GSTT2
(-)-catechin	HADH
(-)-catechin	HAGH
(-)-catechin	HCK
(-)-catechin	HDAC8
(-)-catechin	HEXB
(-)-catechin	HINT1
(-)-catechin	HK1
(-)-catechin	HMGCR
(-)-catechin	HMOX1
(-)-catechin	HNMT
(-)-catechin	HPGDS
(-)-catechin	HPN
(-)-catechin	HPRT1
(-)-catechin	HRAS
(-)-catechin	HSD11B1
(-)-catechin	HSD17B1
(-)-catechin	HSP90AA1
(-)-catechin	HSP90AB1
(-)-catechin	HSPA8
(-)-catechin	IGF1
(-)-catechin	IGF1R
(-)-catechin	IL2
(-)-catechin	IMPA1
(-)-catechin	IMPDH1
(-)-catechin	IMPDH2
(-)-catechin	INSR
(-)-catechin	ISG20
(-)-catechin	ITK
(-)-catechin	JAK2
(-)-catechin	JAK3
(-)-catechin	KDR
(-)-catechin	KIF11
(-)-catechin	KIT
(-)-catechin	KYAT1
(-)-catechin	LCK
(-)-catechin	LCN2
(-)-catechin	LDHB
(-)-catechin	LGALS2
(-)-catechin	LGALS3
(-)-catechin	LSS
(-)-catechin	LTA4H
(-)-catechin	LYZ
(-)-catechin	MAN1B1
(-)-catechin	MAOB
(-)-catechin	MAP2K1
(-)-catechin	MAPK1
(-)-catechin	MAPK10
(-)-catechin	MAPK14
(-)-catechin	MAPK8
(-)-catechin	MAPKAPK2
(-)-catechin	MET
(-)-catechin	METAP2
(-)-catechin	MIF
(-)-catechin	MME
(-)-catechin	MMP12
(-)-catechin	MMP13
(-)-catechin	MMP16
(-)-catechin	MMP3
(-)-catechin	MMP8
(-)-catechin	MMP9
(-)-catechin	MTAP
(-)-catechin	MTHFD1
(-)-catechin	NDST1
(-)-catechin	NMNAT1
(-)-catechin	NOS2
(-)-catechin	NOS3
(-)-catechin	NQO1
(-)-catechin	NR1H2
(-)-catechin	NR1H3
(-)-catechin	NR1H4
(-)-catechin	NR1I2
(-)-catechin	NR3C1
(-)-catechin	NR3C2
(-)-catechin	NT5M
(-)-catechin	OAT
(-)-catechin	OTC
(-)-catechin	PAH
(-)-catechin	PAK6
(-)-catechin	PAPSS1
(-)-catechin	PCK1
(-)-catechin	PDE4B
(-)-catechin	PDE4D
(-)-catechin	PDE5A
(-)-catechin	PDHB
(-)-catechin	PDK2
(-)-catechin	PDPK1
(-)-catechin	PGF
(-)-catechin	PGR
(-)-catechin	PIK3CG
(-)-catechin	PIK3R1
(-)-catechin	PIM1
(-)-catechin	PITPNA
(-)-catechin	PKLR
(-)-catechin	PLA2G10
(-)-catechin	PLA2G2A
(-)-catechin	PLAU
(-)-catechin	PLEKHA4
(-)-catechin	PNMT
(-)-catechin	PNP
(-)-catechin	PNPO
(-)-catechin	PPARA
(-)-catechin	PPARG
(-)-catechin	PPCDC
(-)-catechin	PPP1CC
(-)-catechin	PPP5C
(-)-catechin	PRKACA
(-)-catechin	PRKCQ
(-)-catechin	PTPN1
(-)-catechin	PTPN11
(-)-catechin	PYGL
(-)-catechin	RAB11A
(-)-catechin	RAB5A
(-)-catechin	RAB9A
(-)-catechin	RAB9B
(-)-catechin	RAC2
(-)-catechin	RAN
(-)-catechin	RARA
(-)-catechin	RARB
(-)-catechin	RARG
(-)-catechin	RBP4
(-)-catechin	REG1A
(-)-catechin	REN
(-)-catechin	RHEB
(-)-catechin	RHOA
(-)-catechin	RNASE3
(-)-catechin	RNASEL
(-)-catechin	RXRA
(-)-catechin	S100A9
(-)-catechin	SDS
(-)-catechin	SEC14L2
(-)-catechin	SELP
(-)-catechin	SERPINA1
(-)-catechin	SHBG
(-)-catechin	SHMT1
(-)-catechin	SOD2
(-)-catechin	SORD
(-)-catechin	SRC
(-)-catechin	SRM
(-)-catechin	SSE1
(-)-catechin	ST14
(-)-catechin	STAT1
(-)-catechin	SULT1E1
(-)-catechin	SULT2A1
(-)-catechin	SULT2B1
(-)-catechin	SYK
(-)-catechin	TEK
(-)-catechin	TGFB2
(-)-catechin	TGFBR2
(-)-catechin	TGM2
(-)-catechin	TGM3
(-)-catechin	THRA
(-)-catechin	THRB
(-)-catechin	TK1
(-)-catechin	TNK2
(-)-catechin	TPH1
(-)-catechin	TPI1
(-)-catechin	TPSB2
(-)-catechin	TRAPPC3
(-)-catechin	TREM1
(-)-catechin	TTR
(-)-catechin	TYMS
(-)-catechin	UCK2
(-)-catechin	UMPS
(-)-catechin	VDR
(-)-catechin	XIAP
(-)-catechin	YARS
(-)-catechin	ZAP70
(+)-Dehydrodiconiferyl alcohol	ABL1
(+)-Dehydrodiconiferyl alcohol	ABO
(+)-Dehydrodiconiferyl alcohol	ACADM
(+)-Dehydrodiconiferyl alcohol	ACAT1
(+)-Dehydrodiconiferyl alcohol	ACE
(+)-Dehydrodiconiferyl alcohol	ACPP
(+)-Dehydrodiconiferyl alcohol	ADAM17
(+)-Dehydrodiconiferyl alcohol	ADH
(+)-Dehydrodiconiferyl alcohol	ADH1C
(+)-Dehydrodiconiferyl alcohol	ADK
(+)-Dehydrodiconiferyl alcohol	AGXT
(+)-Dehydrodiconiferyl alcohol	AHCY
(+)-Dehydrodiconiferyl alcohol	AKR1B1
(+)-Dehydrodiconiferyl alcohol	AKR1C1
(+)-Dehydrodiconiferyl alcohol	AKR1C2
(+)-Dehydrodiconiferyl alcohol	AKR1C3
(+)-Dehydrodiconiferyl alcohol	AKT2
(+)-Dehydrodiconiferyl alcohol	ALB
(+)-Dehydrodiconiferyl alcohol	ALDH2
(+)-Dehydrodiconiferyl alcohol	ALDOA
(+)-Dehydrodiconiferyl alcohol	AMD1
(+)-Dehydrodiconiferyl alcohol	AMY1A
(+)-Dehydrodiconiferyl alcohol	AMY1B
(+)-Dehydrodiconiferyl alcohol	AMY1C
(+)-Dehydrodiconiferyl alcohol	AMY2A
(+)-Dehydrodiconiferyl alcohol	ANG
(+)-Dehydrodiconiferyl alcohol	ANXA5
(+)-Dehydrodiconiferyl alcohol	APAF1
(+)-Dehydrodiconiferyl alcohol	APOA2
(+)-Dehydrodiconiferyl alcohol	APRT
(+)-Dehydrodiconiferyl alcohol	AR
(+)-Dehydrodiconiferyl alcohol	ARG1
(+)-Dehydrodiconiferyl alcohol	ARG2
(+)-Dehydrodiconiferyl alcohol	ARHGAP1
(+)-Dehydrodiconiferyl alcohol	ARL5A
(+)-Dehydrodiconiferyl alcohol	ATOX1
(+)-Dehydrodiconiferyl alcohol	AURKA
(+)-Dehydrodiconiferyl alcohol	B3GAT1
(+)-Dehydrodiconiferyl alcohol	BACE1
(+)-Dehydrodiconiferyl alcohol	BCAT2
(+)-Dehydrodiconiferyl alcohol	BCHE
(+)-Dehydrodiconiferyl alcohol	BHMT
(+)-Dehydrodiconiferyl alcohol	BIRC7
(+)-Dehydrodiconiferyl alcohol	BMP7
(+)-Dehydrodiconiferyl alcohol	BRAF
(+)-Dehydrodiconiferyl alcohol	BST1
(+)-Dehydrodiconiferyl alcohol	CA1
(+)-Dehydrodiconiferyl alcohol	CA2
(+)-Dehydrodiconiferyl alcohol	CASP1
(+)-Dehydrodiconiferyl alcohol	CASP3
(+)-Dehydrodiconiferyl alcohol	CASP7
(+)-Dehydrodiconiferyl alcohol	CBR1
(+)-Dehydrodiconiferyl alcohol	CBS
(+)-Dehydrodiconiferyl alcohol	CCL5
(+)-Dehydrodiconiferyl alcohol	CCNA2
(+)-Dehydrodiconiferyl alcohol	CCNT1
(+)-Dehydrodiconiferyl alcohol	CD1A
(+)-Dehydrodiconiferyl alcohol	CD209
(+)-Dehydrodiconiferyl alcohol	CDA
(+)-Dehydrodiconiferyl alcohol	CDC42
(+)-Dehydrodiconiferyl alcohol	CDK2
(+)-Dehydrodiconiferyl alcohol	CDK5R1
(+)-Dehydrodiconiferyl alcohol	CDK6
(+)-Dehydrodiconiferyl alcohol	CDK7
(+)-Dehydrodiconiferyl alcohol	CES1
(+)-Dehydrodiconiferyl alcohol	CFB
(+)-Dehydrodiconiferyl alcohol	CFD
(+)-Dehydrodiconiferyl alcohol	CHEK1
(+)-Dehydrodiconiferyl alcohol	CHIT1
(+)-Dehydrodiconiferyl alcohol	CLEC4M
(+)-Dehydrodiconiferyl alcohol	CLK1
(+)-Dehydrodiconiferyl alcohol	CMA1
(+)-Dehydrodiconiferyl alcohol	CRABP2
(+)-Dehydrodiconiferyl alcohol	CSNK1G2
(+)-Dehydrodiconiferyl alcohol	CTNNA1
(+)-Dehydrodiconiferyl alcohol	CTSD
(+)-Dehydrodiconiferyl alcohol	CTSF
(+)-Dehydrodiconiferyl alcohol	CTSG
(+)-Dehydrodiconiferyl alcohol	CTSK
(+)-Dehydrodiconiferyl alcohol	CTSS
(+)-Dehydrodiconiferyl alcohol	CYP19A1
(+)-Dehydrodiconiferyl alcohol	CYP2C9
(+)-Dehydrodiconiferyl alcohol	DCK
(+)-Dehydrodiconiferyl alcohol	DDX39B
(+)-Dehydrodiconiferyl alcohol	DHFR
(+)-Dehydrodiconiferyl alcohol	DHODH
(+)-Dehydrodiconiferyl alcohol	DPEP1
(+)-Dehydrodiconiferyl alcohol	DPP4
(+)-Dehydrodiconiferyl alcohol	DTYMK
(+)-Dehydrodiconiferyl alcohol	DUSP6
(+)-Dehydrodiconiferyl alcohol	EGFR
(+)-Dehydrodiconiferyl alcohol	EIF4E
(+)-Dehydrodiconiferyl alcohol	ELANE
(+)-Dehydrodiconiferyl alcohol	EPHA2
(+)-Dehydrodiconiferyl alcohol	EPHB4
(+)-Dehydrodiconiferyl alcohol	EPHX2
(+)-Dehydrodiconiferyl alcohol	ERBB4
(+)-Dehydrodiconiferyl alcohol	ESR1
(+)-Dehydrodiconiferyl alcohol	ESR2
(+)-Dehydrodiconiferyl alcohol	ESRRG
(+)-Dehydrodiconiferyl alcohol	F10
(+)-Dehydrodiconiferyl alcohol	F11
(+)-Dehydrodiconiferyl alcohol	F2
(+)-Dehydrodiconiferyl alcohol	F7
(+)-Dehydrodiconiferyl alcohol	FABP3
(+)-Dehydrodiconiferyl alcohol	FABP4
(+)-Dehydrodiconiferyl alcohol	FABP6
(+)-Dehydrodiconiferyl alcohol	FABP7
(+)-Dehydrodiconiferyl alcohol	FAP
(+)-Dehydrodiconiferyl alcohol	FDPS
(+)-Dehydrodiconiferyl alcohol	FECH
(+)-Dehydrodiconiferyl alcohol	FGFR1
(+)-Dehydrodiconiferyl alcohol	FGG
(+)-Dehydrodiconiferyl alcohol	FKBP1A
(+)-Dehydrodiconiferyl alcohol	FNTA
(+)-Dehydrodiconiferyl alcohol	GALE
(+)-Dehydrodiconiferyl alcohol	GART
(+)-Dehydrodiconiferyl alcohol	GBA
(+)-Dehydrodiconiferyl alcohol	GC
(+)-Dehydrodiconiferyl alcohol	GCDH
(+)-Dehydrodiconiferyl alcohol	GCK
(+)-Dehydrodiconiferyl alcohol	GLTP
(+)-Dehydrodiconiferyl alcohol	GMPR
(+)-Dehydrodiconiferyl alcohol	GMPR2
(+)-Dehydrodiconiferyl alcohol	GNPDA1
(+)-Dehydrodiconiferyl alcohol	GNPDA2
(+)-Dehydrodiconiferyl alcohol	GPI
(+)-Dehydrodiconiferyl alcohol	GSK3B
(+)-Dehydrodiconiferyl alcohol	GSR
(+)-Dehydrodiconiferyl alcohol	GSTA1
(+)-Dehydrodiconiferyl alcohol	GSTA3
(+)-Dehydrodiconiferyl alcohol	GSTM1
(+)-Dehydrodiconiferyl alcohol	GSTM2
(+)-Dehydrodiconiferyl alcohol	GSTO1
(+)-Dehydrodiconiferyl alcohol	GSTP1
(+)-Dehydrodiconiferyl alcohol	GSTT2
(+)-Dehydrodiconiferyl alcohol	HADH
(+)-Dehydrodiconiferyl alcohol	HAGH
(+)-Dehydrodiconiferyl alcohol	HCK
(+)-Dehydrodiconiferyl alcohol	HDAC8
(+)-Dehydrodiconiferyl alcohol	HEXB
(+)-Dehydrodiconiferyl alcohol	HINT1
(+)-Dehydrodiconiferyl alcohol	HK1
(+)-Dehydrodiconiferyl alcohol	HMGCR
(+)-Dehydrodiconiferyl alcohol	HNF4G
(+)-Dehydrodiconiferyl alcohol	HPGDS
(+)-Dehydrodiconiferyl alcohol	HPN
(+)-Dehydrodiconiferyl alcohol	HPRT1
(+)-Dehydrodiconiferyl alcohol	HRAS
(+)-Dehydrodiconiferyl alcohol	HSD11B1
(+)-Dehydrodiconiferyl alcohol	HSD17B1
(+)-Dehydrodiconiferyl alcohol	HSP90AA1
(+)-Dehydrodiconiferyl alcohol	HSPA8
(+)-Dehydrodiconiferyl alcohol	IGF1
(+)-Dehydrodiconiferyl alcohol	IGF1R
(+)-Dehydrodiconiferyl alcohol	IL2
(+)-Dehydrodiconiferyl alcohol	IMPA1
(+)-Dehydrodiconiferyl alcohol	IMPDH1
(+)-Dehydrodiconiferyl alcohol	IMPDH2
(+)-Dehydrodiconiferyl alcohol	INSR
(+)-Dehydrodiconiferyl alcohol	ISG20
(+)-Dehydrodiconiferyl alcohol	ITK
(+)-Dehydrodiconiferyl alcohol	JAK2
(+)-Dehydrodiconiferyl alcohol	JAK3
(+)-Dehydrodiconiferyl alcohol	KAT2B
(+)-Dehydrodiconiferyl alcohol	KDR
(+)-Dehydrodiconiferyl alcohol	KIF11
(+)-Dehydrodiconiferyl alcohol	LCK
(+)-Dehydrodiconiferyl alcohol	LCN2
(+)-Dehydrodiconiferyl alcohol	LGALS2
(+)-Dehydrodiconiferyl alcohol	LGALS3
(+)-Dehydrodiconiferyl alcohol	LSS
(+)-Dehydrodiconiferyl alcohol	LTA4H
(+)-Dehydrodiconiferyl alcohol	LYZ
(+)-Dehydrodiconiferyl alcohol	MAN1B1
(+)-Dehydrodiconiferyl alcohol	MAOB
(+)-Dehydrodiconiferyl alcohol	MAP2K1
(+)-Dehydrodiconiferyl alcohol	MAPK1
(+)-Dehydrodiconiferyl alcohol	MAPK10
(+)-Dehydrodiconiferyl alcohol	MAPK12
(+)-Dehydrodiconiferyl alcohol	MAPK14
(+)-Dehydrodiconiferyl alcohol	MAPK8
(+)-Dehydrodiconiferyl alcohol	MAPKAPK2
(+)-Dehydrodiconiferyl alcohol	MET
(+)-Dehydrodiconiferyl alcohol	METAP2
(+)-Dehydrodiconiferyl alcohol	MIF
(+)-Dehydrodiconiferyl alcohol	MME
(+)-Dehydrodiconiferyl alcohol	MMP1
(+)-Dehydrodiconiferyl alcohol	MMP12
(+)-Dehydrodiconiferyl alcohol	MMP13
(+)-Dehydrodiconiferyl alcohol	MMP2
(+)-Dehydrodiconiferyl alcohol	MMP3
(+)-Dehydrodiconiferyl alcohol	MMP8
(+)-Dehydrodiconiferyl alcohol	MMP9
(+)-Dehydrodiconiferyl alcohol	MTAP
(+)-Dehydrodiconiferyl alcohol	MTHFD1
(+)-Dehydrodiconiferyl alcohol	NMNAT1
(+)-Dehydrodiconiferyl alcohol	NOS2
(+)-Dehydrodiconiferyl alcohol	NOS3
(+)-Dehydrodiconiferyl alcohol	NQO1
(+)-Dehydrodiconiferyl alcohol	NQO2
(+)-Dehydrodiconiferyl alcohol	NR1H2
(+)-Dehydrodiconiferyl alcohol	NR1H3
(+)-Dehydrodiconiferyl alcohol	NR1H4
(+)-Dehydrodiconiferyl alcohol	NR1I2
(+)-Dehydrodiconiferyl alcohol	NR3C1
(+)-Dehydrodiconiferyl alcohol	NR3C2
(+)-Dehydrodiconiferyl alcohol	NT5M
(+)-Dehydrodiconiferyl alcohol	OAT
(+)-Dehydrodiconiferyl alcohol	OTC
(+)-Dehydrodiconiferyl alcohol	PAH
(+)-Dehydrodiconiferyl alcohol	PAK6
(+)-Dehydrodiconiferyl alcohol	PAPSS1
(+)-Dehydrodiconiferyl alcohol	PCK1
(+)-Dehydrodiconiferyl alcohol	PDE3B
(+)-Dehydrodiconiferyl alcohol	PDE4B
(+)-Dehydrodiconiferyl alcohol	PDE4D
(+)-Dehydrodiconiferyl alcohol	PDE5A
(+)-Dehydrodiconiferyl alcohol	PDHB
(+)-Dehydrodiconiferyl alcohol	PDK2
(+)-Dehydrodiconiferyl alcohol	PDPK1
(+)-Dehydrodiconiferyl alcohol	PGR
(+)-Dehydrodiconiferyl alcohol	PIK3CG
(+)-Dehydrodiconiferyl alcohol	PIM1
(+)-Dehydrodiconiferyl alcohol	PITPNA
(+)-Dehydrodiconiferyl alcohol	PKLR
(+)-Dehydrodiconiferyl alcohol	PLA2G10
(+)-Dehydrodiconiferyl alcohol	PLA2G2A
(+)-Dehydrodiconiferyl alcohol	PLAU
(+)-Dehydrodiconiferyl alcohol	PNMT
(+)-Dehydrodiconiferyl alcohol	PNP
(+)-Dehydrodiconiferyl alcohol	PPARA
(+)-Dehydrodiconiferyl alcohol	PPARD
(+)-Dehydrodiconiferyl alcohol	PPARG
(+)-Dehydrodiconiferyl alcohol	PRKACA
(+)-Dehydrodiconiferyl alcohol	PRKCQ
(+)-Dehydrodiconiferyl alcohol	PTPN1
(+)-Dehydrodiconiferyl alcohol	PTPN11
(+)-Dehydrodiconiferyl alcohol	PYGL
(+)-Dehydrodiconiferyl alcohol	RAB11A
(+)-Dehydrodiconiferyl alcohol	RAB5A
(+)-Dehydrodiconiferyl alcohol	RAC2
(+)-Dehydrodiconiferyl alcohol	RAN
(+)-Dehydrodiconiferyl alcohol	RARA
(+)-Dehydrodiconiferyl alcohol	RARB
(+)-Dehydrodiconiferyl alcohol	RBP4
(+)-Dehydrodiconiferyl alcohol	REG1A
(+)-Dehydrodiconiferyl alcohol	REN
(+)-Dehydrodiconiferyl alcohol	RHEB
(+)-Dehydrodiconiferyl alcohol	RHOA
(+)-Dehydrodiconiferyl alcohol	RNASE2
(+)-Dehydrodiconiferyl alcohol	RNASE3
(+)-Dehydrodiconiferyl alcohol	RXRA
(+)-Dehydrodiconiferyl alcohol	S100A9
(+)-Dehydrodiconiferyl alcohol	SDS
(+)-Dehydrodiconiferyl alcohol	SEC14L2
(+)-Dehydrodiconiferyl alcohol	SELE
(+)-Dehydrodiconiferyl alcohol	SELP
(+)-Dehydrodiconiferyl alcohol	SERPINA1
(+)-Dehydrodiconiferyl alcohol	SETD7
(+)-Dehydrodiconiferyl alcohol	SHBG
(+)-Dehydrodiconiferyl alcohol	SHMT1
(+)-Dehydrodiconiferyl alcohol	SOD2
(+)-Dehydrodiconiferyl alcohol	SORD
(+)-Dehydrodiconiferyl alcohol	SRC
(+)-Dehydrodiconiferyl alcohol	SSE1
(+)-Dehydrodiconiferyl alcohol	ST14
(+)-Dehydrodiconiferyl alcohol	STAT1
(+)-Dehydrodiconiferyl alcohol	STS
(+)-Dehydrodiconiferyl alcohol	SULT1E1
(+)-Dehydrodiconiferyl alcohol	SULT2A1
(+)-Dehydrodiconiferyl alcohol	SULT2B1
(+)-Dehydrodiconiferyl alcohol	SYK
(+)-Dehydrodiconiferyl alcohol	TAP1
(+)-Dehydrodiconiferyl alcohol	TEK
(+)-Dehydrodiconiferyl alcohol	TGFBR1
(+)-Dehydrodiconiferyl alcohol	TGM3
(+)-Dehydrodiconiferyl alcohol	THRA
(+)-Dehydrodiconiferyl alcohol	THRB
(+)-Dehydrodiconiferyl alcohol	TK1
(+)-Dehydrodiconiferyl alcohol	TNK2
(+)-Dehydrodiconiferyl alcohol	TPH1
(+)-Dehydrodiconiferyl alcohol	TPI1
(+)-Dehydrodiconiferyl alcohol	TRAPPC3
(+)-Dehydrodiconiferyl alcohol	TTR
(+)-Dehydrodiconiferyl alcohol	TYMS
(+)-Dehydrodiconiferyl alcohol	UCK2
(+)-Dehydrodiconiferyl alcohol	UMPS
(+)-Dehydrodiconiferyl alcohol	VDR
(+)-Dehydrodiconiferyl alcohol	XIAP
(+)-Dehydrodiconiferyl alcohol	YARS
(+)-Dehydrodiconiferyl alcohol	ZAP70
1,2,5,6-tetrahydrotanshinone	ABL1
1,2,5,6-tetrahydrotanshinone	ABO
1,2,5,6-tetrahydrotanshinone	ACADM
1,2,5,6-tetrahydrotanshinone	ADAM17
1,2,5,6-tetrahydrotanshinone	ADAM33
1,2,5,6-tetrahydrotanshinone	ADH
1,2,5,6-tetrahydrotanshinone	ADH1C
1,2,5,6-tetrahydrotanshinone	ADK
1,2,5,6-tetrahydrotanshinone	AKR1B1
1,2,5,6-tetrahydrotanshinone	AKR1C1
1,2,5,6-tetrahydrotanshinone	AKR1C2
1,2,5,6-tetrahydrotanshinone	AKR1C3
1,2,5,6-tetrahydrotanshinone	AKT2
1,2,5,6-tetrahydrotanshinone	ALB
1,2,5,6-tetrahydrotanshinone	AMD1
1,2,5,6-tetrahydrotanshinone	ANG
1,2,5,6-tetrahydrotanshinone	ANXA5
1,2,5,6-tetrahydrotanshinone	APOA2
1,2,5,6-tetrahydrotanshinone	AR
1,2,5,6-tetrahydrotanshinone	ARL5A
1,2,5,6-tetrahydrotanshinone	AURKA
1,2,5,6-tetrahydrotanshinone	BACE1
1,2,5,6-tetrahydrotanshinone	BCAT2
1,2,5,6-tetrahydrotanshinone	BCHE
1,2,5,6-tetrahydrotanshinone	BCL2L1
1,2,5,6-tetrahydrotanshinone	BHMT
1,2,5,6-tetrahydrotanshinone	BIRC7
1,2,5,6-tetrahydrotanshinone	BLVRB
1,2,5,6-tetrahydrotanshinone	BMP2
1,2,5,6-tetrahydrotanshinone	BRAF
1,2,5,6-tetrahydrotanshinone	BTK
1,2,5,6-tetrahydrotanshinone	CA2
1,2,5,6-tetrahydrotanshinone	CASP1
1,2,5,6-tetrahydrotanshinone	CASP3
1,2,5,6-tetrahydrotanshinone	CBR1
1,2,5,6-tetrahydrotanshinone	CCNA2
1,2,5,6-tetrahydrotanshinone	CCNT1
1,2,5,6-tetrahydrotanshinone	CDA
1,2,5,6-tetrahydrotanshinone	CDK2
1,2,5,6-tetrahydrotanshinone	CDK5R1
1,2,5,6-tetrahydrotanshinone	CDK6
1,2,5,6-tetrahydrotanshinone	CES1
1,2,5,6-tetrahydrotanshinone	CFB
1,2,5,6-tetrahydrotanshinone	CFD
1,2,5,6-tetrahydrotanshinone	CHEK1
1,2,5,6-tetrahydrotanshinone	CRABP2
1,2,5,6-tetrahydrotanshinone	CSK
1,2,5,6-tetrahydrotanshinone	CTNNA1
1,2,5,6-tetrahydrotanshinone	CTSB
1,2,5,6-tetrahydrotanshinone	CTSF
1,2,5,6-tetrahydrotanshinone	CTSG
1,2,5,6-tetrahydrotanshinone	CTSK
1,2,5,6-tetrahydrotanshinone	CTSS
1,2,5,6-tetrahydrotanshinone	CYP19A1
1,2,5,6-tetrahydrotanshinone	CYP2C8
1,2,5,6-tetrahydrotanshinone	CYP2C9
1,2,5,6-tetrahydrotanshinone	DAPK1
1,2,5,6-tetrahydrotanshinone	DCK
1,2,5,6-tetrahydrotanshinone	DHFR
1,2,5,6-tetrahydrotanshinone	DHODH
1,2,5,6-tetrahydrotanshinone	DPEP1
1,2,5,6-tetrahydrotanshinone	DPP4
1,2,5,6-tetrahydrotanshinone	DTYMK
1,2,5,6-tetrahydrotanshinone	DUSP6
1,2,5,6-tetrahydrotanshinone	DUT
1,2,5,6-tetrahydrotanshinone	EGFR
1,2,5,6-tetrahydrotanshinone	EIF4E
1,2,5,6-tetrahydrotanshinone	ELANE
1,2,5,6-tetrahydrotanshinone	EPHB4
1,2,5,6-tetrahydrotanshinone	EPHX2
1,2,5,6-tetrahydrotanshinone	ERBB4
1,2,5,6-tetrahydrotanshinone	ESR1
1,2,5,6-tetrahydrotanshinone	ESR2
1,2,5,6-tetrahydrotanshinone	ESRRG
1,2,5,6-tetrahydrotanshinone	F10
1,2,5,6-tetrahydrotanshinone	F11
1,2,5,6-tetrahydrotanshinone	F2
1,2,5,6-tetrahydrotanshinone	FABP3
1,2,5,6-tetrahydrotanshinone	FABP4
1,2,5,6-tetrahydrotanshinone	FABP6
1,2,5,6-tetrahydrotanshinone	FABP7
1,2,5,6-tetrahydrotanshinone	FDPS
1,2,5,6-tetrahydrotanshinone	FECH
1,2,5,6-tetrahydrotanshinone	FGFR1
1,2,5,6-tetrahydrotanshinone	FGFR2
1,2,5,6-tetrahydrotanshinone	FGG
1,2,5,6-tetrahydrotanshinone	FKBP1A
1,2,5,6-tetrahydrotanshinone	FKBP1B
1,2,5,6-tetrahydrotanshinone	FKBP3
1,2,5,6-tetrahydrotanshinone	FNTA
1,2,5,6-tetrahydrotanshinone	FOLH1
1,2,5,6-tetrahydrotanshinone	GART
1,2,5,6-tetrahydrotanshinone	GC
1,2,5,6-tetrahydrotanshinone	GLO1
1,2,5,6-tetrahydrotanshinone	GM2A
1,2,5,6-tetrahydrotanshinone	GPI
1,2,5,6-tetrahydrotanshinone	GRB2
1,2,5,6-tetrahydrotanshinone	GSK3B
1,2,5,6-tetrahydrotanshinone	GSR
1,2,5,6-tetrahydrotanshinone	GSTA1
1,2,5,6-tetrahydrotanshinone	GSTA3
1,2,5,6-tetrahydrotanshinone	GSTM2
1,2,5,6-tetrahydrotanshinone	GSTP1
1,2,5,6-tetrahydrotanshinone	GSTT2
1,2,5,6-tetrahydrotanshinone	HCK
1,2,5,6-tetrahydrotanshinone	HDAC8
1,2,5,6-tetrahydrotanshinone	HMGCR
1,2,5,6-tetrahydrotanshinone	HMOX1
1,2,5,6-tetrahydrotanshinone	HNF4G
1,2,5,6-tetrahydrotanshinone	HNMT
1,2,5,6-tetrahydrotanshinone	HPGDS
1,2,5,6-tetrahydrotanshinone	HPN
1,2,5,6-tetrahydrotanshinone	HRAS
1,2,5,6-tetrahydrotanshinone	HSD11B1
1,2,5,6-tetrahydrotanshinone	HSD17B1
1,2,5,6-tetrahydrotanshinone	HSP90AA1
1,2,5,6-tetrahydrotanshinone	HSP90AB1
1,2,5,6-tetrahydrotanshinone	IGF1
1,2,5,6-tetrahydrotanshinone	IGF1R
1,2,5,6-tetrahydrotanshinone	IL2
1,2,5,6-tetrahydrotanshinone	IMPDH2
1,2,5,6-tetrahydrotanshinone	INSR
1,2,5,6-tetrahydrotanshinone	ITGAL
1,2,5,6-tetrahydrotanshinone	ITK
1,2,5,6-tetrahydrotanshinone	JAK2
1,2,5,6-tetrahydrotanshinone	JAK3
1,2,5,6-tetrahydrotanshinone	KDR
1,2,5,6-tetrahydrotanshinone	KIF11
1,2,5,6-tetrahydrotanshinone	KIT
1,2,5,6-tetrahydrotanshinone	LCK
1,2,5,6-tetrahydrotanshinone	LCN2
1,2,5,6-tetrahydrotanshinone	LSS
1,2,5,6-tetrahydrotanshinone	LTA4H
1,2,5,6-tetrahydrotanshinone	MAOB
1,2,5,6-tetrahydrotanshinone	MAP2K1
1,2,5,6-tetrahydrotanshinone	MAPK1
1,2,5,6-tetrahydrotanshinone	MAPK10
1,2,5,6-tetrahydrotanshinone	MAPK14
1,2,5,6-tetrahydrotanshinone	MAPK8
1,2,5,6-tetrahydrotanshinone	MAPKAPK2
1,2,5,6-tetrahydrotanshinone	MDM2
1,2,5,6-tetrahydrotanshinone	MET
1,2,5,6-tetrahydrotanshinone	METAP2
1,2,5,6-tetrahydrotanshinone	MIF
1,2,5,6-tetrahydrotanshinone	MME
1,2,5,6-tetrahydrotanshinone	MMP12
1,2,5,6-tetrahydrotanshinone	MMP13
1,2,5,6-tetrahydrotanshinone	MMP2
1,2,5,6-tetrahydrotanshinone	MMP3
1,2,5,6-tetrahydrotanshinone	MMP8
1,2,5,6-tetrahydrotanshinone	MMP9
1,2,5,6-tetrahydrotanshinone	MTAP
1,2,5,6-tetrahydrotanshinone	MTHFD1
1,2,5,6-tetrahydrotanshinone	NMNAT1
1,2,5,6-tetrahydrotanshinone	NOS2
1,2,5,6-tetrahydrotanshinone	NOS3
1,2,5,6-tetrahydrotanshinone	NQO1
1,2,5,6-tetrahydrotanshinone	NR1H2
1,2,5,6-tetrahydrotanshinone	NR1H3
1,2,5,6-tetrahydrotanshinone	NR1H4
1,2,5,6-tetrahydrotanshinone	NR1I2
1,2,5,6-tetrahydrotanshinone	NR1I3
1,2,5,6-tetrahydrotanshinone	NR3C1
1,2,5,6-tetrahydrotanshinone	NR3C2
1,2,5,6-tetrahydrotanshinone	NT5M
1,2,5,6-tetrahydrotanshinone	OAT
1,2,5,6-tetrahydrotanshinone	PADI4
1,2,5,6-tetrahydrotanshinone	PAK7
1,2,5,6-tetrahydrotanshinone	PARP1
1,2,5,6-tetrahydrotanshinone	PCK1
1,2,5,6-tetrahydrotanshinone	PCTP
1,2,5,6-tetrahydrotanshinone	PDE3B
1,2,5,6-tetrahydrotanshinone	PDE4B
1,2,5,6-tetrahydrotanshinone	PDE4D
1,2,5,6-tetrahydrotanshinone	PDE5A
1,2,5,6-tetrahydrotanshinone	PDK2
1,2,5,6-tetrahydrotanshinone	PDPK1
1,2,5,6-tetrahydrotanshinone	PFKFB1
1,2,5,6-tetrahydrotanshinone	PGF
1,2,5,6-tetrahydrotanshinone	PGR
1,2,5,6-tetrahydrotanshinone	PIK3CG
1,2,5,6-tetrahydrotanshinone	PIK3R1
1,2,5,6-tetrahydrotanshinone	PIM1
1,2,5,6-tetrahydrotanshinone	PITPNA
1,2,5,6-tetrahydrotanshinone	PLA2G2A
1,2,5,6-tetrahydrotanshinone	PLAU
1,2,5,6-tetrahydrotanshinone	PNMT
1,2,5,6-tetrahydrotanshinone	PPARA
1,2,5,6-tetrahydrotanshinone	PPARD
1,2,5,6-tetrahydrotanshinone	PPARG
1,2,5,6-tetrahydrotanshinone	PPIA
1,2,5,6-tetrahydrotanshinone	PPP1CC
1,2,5,6-tetrahydrotanshinone	PPP5C
1,2,5,6-tetrahydrotanshinone	PRKACA
1,2,5,6-tetrahydrotanshinone	PRKCQ
1,2,5,6-tetrahydrotanshinone	PROCR
1,2,5,6-tetrahydrotanshinone	PTPN1
1,2,5,6-tetrahydrotanshinone	PTPN11
1,2,5,6-tetrahydrotanshinone	PYGL
1,2,5,6-tetrahydrotanshinone	RAB5A
1,2,5,6-tetrahydrotanshinone	RAC1
1,2,5,6-tetrahydrotanshinone	RAP2A
1,2,5,6-tetrahydrotanshinone	RARA
1,2,5,6-tetrahydrotanshinone	RARB
1,2,5,6-tetrahydrotanshinone	RARG
1,2,5,6-tetrahydrotanshinone	RBP4
1,2,5,6-tetrahydrotanshinone	REN
1,2,5,6-tetrahydrotanshinone	RND3
1,2,5,6-tetrahydrotanshinone	RORA
1,2,5,6-tetrahydrotanshinone	RXRA
1,2,5,6-tetrahydrotanshinone	RXRB
1,2,5,6-tetrahydrotanshinone	S100A9
1,2,5,6-tetrahydrotanshinone	SDS
1,2,5,6-tetrahydrotanshinone	SEC14L2
1,2,5,6-tetrahydrotanshinone	SERPINA1
1,2,5,6-tetrahydrotanshinone	SETD7
1,2,5,6-tetrahydrotanshinone	SHBG
1,2,5,6-tetrahydrotanshinone	SHMT1
1,2,5,6-tetrahydrotanshinone	SIRT5
1,2,5,6-tetrahydrotanshinone	SOD2
1,2,5,6-tetrahydrotanshinone	SORD
1,2,5,6-tetrahydrotanshinone	SRC
1,2,5,6-tetrahydrotanshinone	STS
1,2,5,6-tetrahydrotanshinone	SULT1E1
1,2,5,6-tetrahydrotanshinone	SULT2A1
1,2,5,6-tetrahydrotanshinone	SULT2B1
1,2,5,6-tetrahydrotanshinone	SYK
1,2,5,6-tetrahydrotanshinone	TEK
1,2,5,6-tetrahydrotanshinone	TGFB2
1,2,5,6-tetrahydrotanshinone	TGFBR1
1,2,5,6-tetrahydrotanshinone	TGM3
1,2,5,6-tetrahydrotanshinone	THRA
1,2,5,6-tetrahydrotanshinone	THRB
1,2,5,6-tetrahydrotanshinone	TNNC1
1,2,5,6-tetrahydrotanshinone	TPH1
1,2,5,6-tetrahydrotanshinone	TPSB2
1,2,5,6-tetrahydrotanshinone	TRAPPC3
1,2,5,6-tetrahydrotanshinone	TTPA
1,2,5,6-tetrahydrotanshinone	TTR
1,2,5,6-tetrahydrotanshinone	TYMS
1,2,5,6-tetrahydrotanshinone	UCK2
1,2,5,6-tetrahydrotanshinone	VDR
1,2,5,6-tetrahydrotanshinone	WARS
1,2,5,6-tetrahydrotanshinone	WAS
1,2,5,6-tetrahydrotanshinone	XIAP
1,2,5,6-tetrahydrotanshinone	YARS
1,2,5,6-tetrahydrotanshinone	ZAP70
1,7-Dihydroxy-3,9-dimethoxy pterocarpene	ABL1
1,7-Dihydroxy-3,9-dimethoxy pterocarpene	ABO
1,7-Dihydroxy-3,9-dimethoxy pterocarpene	ADAM17
1,7-Dihydroxy-3,9-dimethoxy pterocarpene	ADH
1,7-Dihydroxy-3,9-dimethoxy pterocarpene	ADH1C
1,7-Dihydroxy-3,9-dimethoxy pterocarpene	AKR1B1
1,7-Dihydroxy-3,9-dimethoxy pterocarpene	AKR1C1
1,7-Dihydroxy-3,9-dimethoxy pterocarpene	AKR1C3
1,7-Dihydroxy-3,9-dimethoxy pterocarpene	AKT1
1,7-Dihydroxy-3,9-dimethoxy pterocarpene	ALB
1,7-Dihydroxy-3,9-dimethoxy pterocarpene	AMY2A
1,7-Dihydroxy-3,9-dimethoxy pterocarpene	APOA2
1,7-Dihydroxy-3,9-dimethoxy pterocarpene	AR
1,7-Dihydroxy-3,9-dimethoxy pterocarpene	BACE1
1,7-Dihydroxy-3,9-dimethoxy pterocarpene	BHMT
1,7-Dihydroxy-3,9-dimethoxy pterocarpene	BIRC7
1,7-Dihydroxy-3,9-dimethoxy pterocarpene	BMP2
1,7-Dihydroxy-3,9-dimethoxy pterocarpene	BTK
1,7-Dihydroxy-3,9-dimethoxy pterocarpene	CA2
1,7-Dihydroxy-3,9-dimethoxy pterocarpene	CASP1
1,7-Dihydroxy-3,9-dimethoxy pterocarpene	CASP3
1,7-Dihydroxy-3,9-dimethoxy pterocarpene	CCL5
1,7-Dihydroxy-3,9-dimethoxy pterocarpene	CCNA2
1,7-Dihydroxy-3,9-dimethoxy pterocarpene	CDK2
1,7-Dihydroxy-3,9-dimethoxy pterocarpene	CDK6
1,7-Dihydroxy-3,9-dimethoxy pterocarpene	CFD
1,7-Dihydroxy-3,9-dimethoxy pterocarpene	CHEK1
1,7-Dihydroxy-3,9-dimethoxy pterocarpene	CRABP2
1,7-Dihydroxy-3,9-dimethoxy pterocarpene	CTNNA1
1,7-Dihydroxy-3,9-dimethoxy pterocarpene	CTSK
1,7-Dihydroxy-3,9-dimethoxy pterocarpene	CYP2C8
1,7-Dihydroxy-3,9-dimethoxy pterocarpene	CYP2C9
1,7-Dihydroxy-3,9-dimethoxy pterocarpene	DCK
1,7-Dihydroxy-3,9-dimethoxy pterocarpene	DHFR
1,7-Dihydroxy-3,9-dimethoxy pterocarpene	DHODH
1,7-Dihydroxy-3,9-dimethoxy pterocarpene	DPEP1
1,7-Dihydroxy-3,9-dimethoxy pterocarpene	DPP4
1,7-Dihydroxy-3,9-dimethoxy pterocarpene	DTYMK
1,7-Dihydroxy-3,9-dimethoxy pterocarpene	DUSP6
1,7-Dihydroxy-3,9-dimethoxy pterocarpene	EGFR
1,7-Dihydroxy-3,9-dimethoxy pterocarpene	EIF4E
1,7-Dihydroxy-3,9-dimethoxy pterocarpene	ELANE
1,7-Dihydroxy-3,9-dimethoxy pterocarpene	EPHB4
1,7-Dihydroxy-3,9-dimethoxy pterocarpene	ESR1
1,7-Dihydroxy-3,9-dimethoxy pterocarpene	ESR2
1,7-Dihydroxy-3,9-dimethoxy pterocarpene	ESRRG
1,7-Dihydroxy-3,9-dimethoxy pterocarpene	F2
1,7-Dihydroxy-3,9-dimethoxy pterocarpene	FABP3
1,7-Dihydroxy-3,9-dimethoxy pterocarpene	FABP6
1,7-Dihydroxy-3,9-dimethoxy pterocarpene	FABP7
1,7-Dihydroxy-3,9-dimethoxy pterocarpene	FECH
1,7-Dihydroxy-3,9-dimethoxy pterocarpene	FGFR1
1,7-Dihydroxy-3,9-dimethoxy pterocarpene	FKBP1A
1,7-Dihydroxy-3,9-dimethoxy pterocarpene	GART
1,7-Dihydroxy-3,9-dimethoxy pterocarpene	GCK
1,7-Dihydroxy-3,9-dimethoxy pterocarpene	GPI
1,7-Dihydroxy-3,9-dimethoxy pterocarpene	GSK3B
1,7-Dihydroxy-3,9-dimethoxy pterocarpene	GSR
1,7-Dihydroxy-3,9-dimethoxy pterocarpene	GSTA1
1,7-Dihydroxy-3,9-dimethoxy pterocarpene	GSTA3
1,7-Dihydroxy-3,9-dimethoxy pterocarpene	GSTP1
1,7-Dihydroxy-3,9-dimethoxy pterocarpene	HADH
1,7-Dihydroxy-3,9-dimethoxy pterocarpene	HAGH
1,7-Dihydroxy-3,9-dimethoxy pterocarpene	HCK
1,7-Dihydroxy-3,9-dimethoxy pterocarpene	HDAC8
1,7-Dihydroxy-3,9-dimethoxy pterocarpene	HEXB
1,7-Dihydroxy-3,9-dimethoxy pterocarpene	HMGCR
1,7-Dihydroxy-3,9-dimethoxy pterocarpene	HNMT
1,7-Dihydroxy-3,9-dimethoxy pterocarpene	HPGDS
1,7-Dihydroxy-3,9-dimethoxy pterocarpene	HRAS
1,7-Dihydroxy-3,9-dimethoxy pterocarpene	HSD11B1
1,7-Dihydroxy-3,9-dimethoxy pterocarpene	HSD17B1
1,7-Dihydroxy-3,9-dimethoxy pterocarpene	HSP90AA1
1,7-Dihydroxy-3,9-dimethoxy pterocarpene	HSPA1A
1,7-Dihydroxy-3,9-dimethoxy pterocarpene	IL2
1,7-Dihydroxy-3,9-dimethoxy pterocarpene	INSR
1,7-Dihydroxy-3,9-dimethoxy pterocarpene	KAT2B
1,7-Dihydroxy-3,9-dimethoxy pterocarpene	KIF11
1,7-Dihydroxy-3,9-dimethoxy pterocarpene	KYAT1
1,7-Dihydroxy-3,9-dimethoxy pterocarpene	LCK
1,7-Dihydroxy-3,9-dimethoxy pterocarpene	LCN2
1,7-Dihydroxy-3,9-dimethoxy pterocarpene	LTA4H
1,7-Dihydroxy-3,9-dimethoxy pterocarpene	LYZ
1,7-Dihydroxy-3,9-dimethoxy pterocarpene	MAOB
1,7-Dihydroxy-3,9-dimethoxy pterocarpene	MAP2K1
1,7-Dihydroxy-3,9-dimethoxy pterocarpene	MAPK14
1,7-Dihydroxy-3,9-dimethoxy pterocarpene	MAPK8
1,7-Dihydroxy-3,9-dimethoxy pterocarpene	MET
1,7-Dihydroxy-3,9-dimethoxy pterocarpene	METAP2
1,7-Dihydroxy-3,9-dimethoxy pterocarpene	MME
1,7-Dihydroxy-3,9-dimethoxy pterocarpene	MMP12
1,7-Dihydroxy-3,9-dimethoxy pterocarpene	MMP3
1,7-Dihydroxy-3,9-dimethoxy pterocarpene	MMP8
1,7-Dihydroxy-3,9-dimethoxy pterocarpene	MTAP
1,7-Dihydroxy-3,9-dimethoxy pterocarpene	NQO1
1,7-Dihydroxy-3,9-dimethoxy pterocarpene	NQO2
1,7-Dihydroxy-3,9-dimethoxy pterocarpene	NR1I2
1,7-Dihydroxy-3,9-dimethoxy pterocarpene	NR3C1
1,7-Dihydroxy-3,9-dimethoxy pterocarpene	NR3C2
1,7-Dihydroxy-3,9-dimethoxy pterocarpene	OAT
1,7-Dihydroxy-3,9-dimethoxy pterocarpene	PCK1
1,7-Dihydroxy-3,9-dimethoxy pterocarpene	PDE4B
1,7-Dihydroxy-3,9-dimethoxy pterocarpene	PDE4D
1,7-Dihydroxy-3,9-dimethoxy pterocarpene	PDPK1
1,7-Dihydroxy-3,9-dimethoxy pterocarpene	PGF
1,7-Dihydroxy-3,9-dimethoxy pterocarpene	PGR
1,7-Dihydroxy-3,9-dimethoxy pterocarpene	PIK3R1
1,7-Dihydroxy-3,9-dimethoxy pterocarpene	PIM1
1,7-Dihydroxy-3,9-dimethoxy pterocarpene	PNMT
1,7-Dihydroxy-3,9-dimethoxy pterocarpene	PPP1CC
1,7-Dihydroxy-3,9-dimethoxy pterocarpene	PPP5C
1,7-Dihydroxy-3,9-dimethoxy pterocarpene	PRKACA
1,7-Dihydroxy-3,9-dimethoxy pterocarpene	PROCR
1,7-Dihydroxy-3,9-dimethoxy pterocarpene	PTPN1
1,7-Dihydroxy-3,9-dimethoxy pterocarpene	PTPN11
1,7-Dihydroxy-3,9-dimethoxy pterocarpene	RAB5A
1,7-Dihydroxy-3,9-dimethoxy pterocarpene	RAB9A
1,7-Dihydroxy-3,9-dimethoxy pterocarpene	RAB9B
1,7-Dihydroxy-3,9-dimethoxy pterocarpene	RAC1
1,7-Dihydroxy-3,9-dimethoxy pterocarpene	RAP2A
1,7-Dihydroxy-3,9-dimethoxy pterocarpene	RARA
1,7-Dihydroxy-3,9-dimethoxy pterocarpene	RARB
1,7-Dihydroxy-3,9-dimethoxy pterocarpene	RARG
1,7-Dihydroxy-3,9-dimethoxy pterocarpene	RBP4
1,7-Dihydroxy-3,9-dimethoxy pterocarpene	REN
1,7-Dihydroxy-3,9-dimethoxy pterocarpene	RXRA
1,7-Dihydroxy-3,9-dimethoxy pterocarpene	SERPINA1
1,7-Dihydroxy-3,9-dimethoxy pterocarpene	SHBG
1,7-Dihydroxy-3,9-dimethoxy pterocarpene	SRC
1,7-Dihydroxy-3,9-dimethoxy pterocarpene	STS
1,7-Dihydroxy-3,9-dimethoxy pterocarpene	SULT1E1
1,7-Dihydroxy-3,9-dimethoxy pterocarpene	SULT2A1
1,7-Dihydroxy-3,9-dimethoxy pterocarpene	THRB
1,7-Dihydroxy-3,9-dimethoxy pterocarpene	TREM1
1,7-Dihydroxy-3,9-dimethoxy pterocarpene	TTPA
1,7-Dihydroxy-3,9-dimethoxy pterocarpene	TTR
1,7-Dihydroxy-3,9-dimethoxy pterocarpene	VDR
11,14-Eicosadienoic acid	ABL1
11,14-Eicosadienoic acid	ABO
11,14-Eicosadienoic acid	ACADM
11,14-Eicosadienoic acid	ACAT1
11,14-Eicosadienoic acid	ACE
11,14-Eicosadienoic acid	ACPP
11,14-Eicosadienoic acid	ADAM17
11,14-Eicosadienoic acid	ADAM33
11,14-Eicosadienoic acid	ADH
11,14-Eicosadienoic acid	ADH1B
11,14-Eicosadienoic acid	ADH1C
11,14-Eicosadienoic acid	ADK
11,14-Eicosadienoic acid	AGXT
11,14-Eicosadienoic acid	AKR1B1
11,14-Eicosadienoic acid	AKR1C1
11,14-Eicosadienoic acid	AKR1C2
11,14-Eicosadienoic acid	AKR1C3
11,14-Eicosadienoic acid	AKT1
11,14-Eicosadienoic acid	AKT2
11,14-Eicosadienoic acid	ALAD
11,14-Eicosadienoic acid	ALB
11,14-Eicosadienoic acid	ALDH2
11,14-Eicosadienoic acid	AMD1
11,14-Eicosadienoic acid	AMY1A
11,14-Eicosadienoic acid	AMY1B
11,14-Eicosadienoic acid	AMY1C
11,14-Eicosadienoic acid	AMY2A
11,14-Eicosadienoic acid	ANXA5
11,14-Eicosadienoic acid	APOA2
11,14-Eicosadienoic acid	AR
11,14-Eicosadienoic acid	ARG1
11,14-Eicosadienoic acid	AURKA
11,14-Eicosadienoic acid	BACE1
11,14-Eicosadienoic acid	BCAT2
11,14-Eicosadienoic acid	BCHE
11,14-Eicosadienoic acid	BCL2L1
11,14-Eicosadienoic acid	BHMT
11,14-Eicosadienoic acid	BIRC7
11,14-Eicosadienoic acid	BLVRB
11,14-Eicosadienoic acid	BMP2
11,14-Eicosadienoic acid	BPI
11,14-Eicosadienoic acid	BRAF
11,14-Eicosadienoic acid	BST1
11,14-Eicosadienoic acid	CA1
11,14-Eicosadienoic acid	CA2
11,14-Eicosadienoic acid	CALM1
11,14-Eicosadienoic acid	CALM2
11,14-Eicosadienoic acid	CALM3
11,14-Eicosadienoic acid	CASP1
11,14-Eicosadienoic acid	CASP3
11,14-Eicosadienoic acid	CASP7
11,14-Eicosadienoic acid	CBR1
11,14-Eicosadienoic acid	CBS
11,14-Eicosadienoic acid	CCNA2
11,14-Eicosadienoic acid	CCNT1
11,14-Eicosadienoic acid	CD1A
11,14-Eicosadienoic acid	CDA
11,14-Eicosadienoic acid	CDK2
11,14-Eicosadienoic acid	CDK6
11,14-Eicosadienoic acid	CDK7
11,14-Eicosadienoic acid	CES1
11,14-Eicosadienoic acid	CFD
11,14-Eicosadienoic acid	CHEK1
11,14-Eicosadienoic acid	CHIT1
11,14-Eicosadienoic acid	CLPP
11,14-Eicosadienoic acid	CMA1
11,14-Eicosadienoic acid	CRABP2
11,14-Eicosadienoic acid	CSK
11,14-Eicosadienoic acid	CSNK2A1
11,14-Eicosadienoic acid	CTNNA1
11,14-Eicosadienoic acid	CTSB
11,14-Eicosadienoic acid	CTSF
11,14-Eicosadienoic acid	CTSG
11,14-Eicosadienoic acid	CTSK
11,14-Eicosadienoic acid	CTSS
11,14-Eicosadienoic acid	CYP2C8
11,14-Eicosadienoic acid	CYP2C9
11,14-Eicosadienoic acid	DAPK1
11,14-Eicosadienoic acid	DCK
11,14-Eicosadienoic acid	DCPS
11,14-Eicosadienoic acid	DHFR
11,14-Eicosadienoic acid	DHODH
11,14-Eicosadienoic acid	DPEP1
11,14-Eicosadienoic acid	DPP4
11,14-Eicosadienoic acid	DTYMK
11,14-Eicosadienoic acid	DUSP6
11,14-Eicosadienoic acid	DUT
11,14-Eicosadienoic acid	EGFR
11,14-Eicosadienoic acid	EIF4E
11,14-Eicosadienoic acid	ELANE
11,14-Eicosadienoic acid	EPHB4
11,14-Eicosadienoic acid	EPHX2
11,14-Eicosadienoic acid	ERBB4
11,14-Eicosadienoic acid	ERRA
11,14-Eicosadienoic acid	ESR1
11,14-Eicosadienoic acid	ESR2
11,14-Eicosadienoic acid	ESRRG
11,14-Eicosadienoic acid	F10
11,14-Eicosadienoic acid	F11
11,14-Eicosadienoic acid	F2
11,14-Eicosadienoic acid	F7
11,14-Eicosadienoic acid	FABP3
11,14-Eicosadienoic acid	FABP4
11,14-Eicosadienoic acid	FABP5
11,14-Eicosadienoic acid	FABP6
11,14-Eicosadienoic acid	FABP7
11,14-Eicosadienoic acid	FDPS
11,14-Eicosadienoic acid	FECH
11,14-Eicosadienoic acid	FGF1
11,14-Eicosadienoic acid	FGFR1
11,14-Eicosadienoic acid	FGFR2
11,14-Eicosadienoic acid	FGG
11,14-Eicosadienoic acid	FKBP1A
11,14-Eicosadienoic acid	FKBP1B
11,14-Eicosadienoic acid	FKBP3
11,14-Eicosadienoic acid	FNTA
11,14-Eicosadienoic acid	FOLH1
11,14-Eicosadienoic acid	GART
11,14-Eicosadienoic acid	GATM
11,14-Eicosadienoic acid	GBA
11,14-Eicosadienoic acid	GC
11,14-Eicosadienoic acid	GCK
11,14-Eicosadienoic acid	GLO1
11,14-Eicosadienoic acid	GM2A
11,14-Eicosadienoic acid	GPI
11,14-Eicosadienoic acid	GRB2
11,14-Eicosadienoic acid	GSK3B
11,14-Eicosadienoic acid	GSR
11,14-Eicosadienoic acid	GSTA1
11,14-Eicosadienoic acid	GSTA3
11,14-Eicosadienoic acid	GSTM1
11,14-Eicosadienoic acid	GSTM2
11,14-Eicosadienoic acid	GSTP1
11,14-Eicosadienoic acid	GSTT2
11,14-Eicosadienoic acid	HADH
11,14-Eicosadienoic acid	HCK
11,14-Eicosadienoic acid	HDAC8
11,14-Eicosadienoic acid	HEXB
11,14-Eicosadienoic acid	HMGCR
11,14-Eicosadienoic acid	HMOX1
11,14-Eicosadienoic acid	HNF4G
11,14-Eicosadienoic acid	HNMT
11,14-Eicosadienoic acid	HPGDS
11,14-Eicosadienoic acid	HPN
11,14-Eicosadienoic acid	HRSP12
11,14-Eicosadienoic acid	HSD11B1
11,14-Eicosadienoic acid	HSD17B1
11,14-Eicosadienoic acid	HSD17B11
11,14-Eicosadienoic acid	HSP90AA1
11,14-Eicosadienoic acid	HSP90AB1
11,14-Eicosadienoic acid	HSPA8
11,14-Eicosadienoic acid	IGF1
11,14-Eicosadienoic acid	IGF1R
11,14-Eicosadienoic acid	IL2
11,14-Eicosadienoic acid	INSR
11,14-Eicosadienoic acid	ITGAL
11,14-Eicosadienoic acid	ITK
11,14-Eicosadienoic acid	IVD
11,14-Eicosadienoic acid	JAK2
11,14-Eicosadienoic acid	JAK3
11,14-Eicosadienoic acid	KAT2B
11,14-Eicosadienoic acid	KDR
11,14-Eicosadienoic acid	KIF11
11,14-Eicosadienoic acid	KIT
11,14-Eicosadienoic acid	KMT5A
11,14-Eicosadienoic acid	KYAT1
11,14-Eicosadienoic acid	LCK
11,14-Eicosadienoic acid	LCN2
11,14-Eicosadienoic acid	LGALS3
11,14-Eicosadienoic acid	LSS
11,14-Eicosadienoic acid	LTA4H
11,14-Eicosadienoic acid	LYZ
11,14-Eicosadienoic acid	MAOA
11,14-Eicosadienoic acid	MAOB
11,14-Eicosadienoic acid	MAP2K1
11,14-Eicosadienoic acid	MAPK1
11,14-Eicosadienoic acid	MAPK10
11,14-Eicosadienoic acid	MAPK14
11,14-Eicosadienoic acid	MAPK8
11,14-Eicosadienoic acid	MAPKAPK2
11,14-Eicosadienoic acid	MDM2
11,14-Eicosadienoic acid	ME2
11,14-Eicosadienoic acid	MET
11,14-Eicosadienoic acid	METAP2
11,14-Eicosadienoic acid	MIF
11,14-Eicosadienoic acid	MME
11,14-Eicosadienoic acid	MMP12
11,14-Eicosadienoic acid	MMP13
11,14-Eicosadienoic acid	MMP16
11,14-Eicosadienoic acid	MMP2
11,14-Eicosadienoic acid	MMP3
11,14-Eicosadienoic acid	MMP7
11,14-Eicosadienoic acid	MMP8
11,14-Eicosadienoic acid	MMP9
11,14-Eicosadienoic acid	MTAP
11,14-Eicosadienoic acid	MTHFD1
11,14-Eicosadienoic acid	NMNAT1
11,14-Eicosadienoic acid	NOS2
11,14-Eicosadienoic acid	NOS3
11,14-Eicosadienoic acid	NQO1
11,14-Eicosadienoic acid	NQO2
11,14-Eicosadienoic acid	NR1H2
11,14-Eicosadienoic acid	NR1H3
11,14-Eicosadienoic acid	NR1H4
11,14-Eicosadienoic acid	NR1I2
11,14-Eicosadienoic acid	NR1I3
11,14-Eicosadienoic acid	NR3C1
11,14-Eicosadienoic acid	NR3C2
11,14-Eicosadienoic acid	NT5M
11,14-Eicosadienoic acid	OAT
11,14-Eicosadienoic acid	OTC
11,14-Eicosadienoic acid	PADI4
11,14-Eicosadienoic acid	PAH
11,14-Eicosadienoic acid	PAK7
11,14-Eicosadienoic acid	PARP1
11,14-Eicosadienoic acid	PCK1
11,14-Eicosadienoic acid	PCTP
11,14-Eicosadienoic acid	PDE3B
11,14-Eicosadienoic acid	PDE4B
11,14-Eicosadienoic acid	PDE4D
11,14-Eicosadienoic acid	PDE5A
11,14-Eicosadienoic acid	PDK2
11,14-Eicosadienoic acid	PDPK1
11,14-Eicosadienoic acid	PGF
11,14-Eicosadienoic acid	PGR
11,14-Eicosadienoic acid	PIK3CG
11,14-Eicosadienoic acid	PIK3R1
11,14-Eicosadienoic acid	PIM1
11,14-Eicosadienoic acid	PITPNA
11,14-Eicosadienoic acid	PLA2G10
11,14-Eicosadienoic acid	PLA2G2A
11,14-Eicosadienoic acid	PLAU
11,14-Eicosadienoic acid	PLK1
11,14-Eicosadienoic acid	PNMT
11,14-Eicosadienoic acid	PPARA
11,14-Eicosadienoic acid	PPARD
11,14-Eicosadienoic acid	PPARG
11,14-Eicosadienoic acid	PPCDC
11,14-Eicosadienoic acid	PPIA
11,14-Eicosadienoic acid	PPP1CC
11,14-Eicosadienoic acid	PPP5C
11,14-Eicosadienoic acid	PRDX5
11,14-Eicosadienoic acid	PRKACA
11,14-Eicosadienoic acid	PRKCQ
11,14-Eicosadienoic acid	PROCR
11,14-Eicosadienoic acid	PSAP
11,14-Eicosadienoic acid	PTPN1
11,14-Eicosadienoic acid	PTPN11
11,14-Eicosadienoic acid	PYGL
11,14-Eicosadienoic acid	RARA
11,14-Eicosadienoic acid	RARB
11,14-Eicosadienoic acid	RARG
11,14-Eicosadienoic acid	RBP4
11,14-Eicosadienoic acid	REN
11,14-Eicosadienoic acid	RFK
11,14-Eicosadienoic acid	RORA
11,14-Eicosadienoic acid	RXRA
11,14-Eicosadienoic acid	RXRB
11,14-Eicosadienoic acid	S100A9
11,14-Eicosadienoic acid	SDS
11,14-Eicosadienoic acid	SEC14L2
11,14-Eicosadienoic acid	SERPINA1
11,14-Eicosadienoic acid	SETD7
11,14-Eicosadienoic acid	SHBG
11,14-Eicosadienoic acid	SHMT1
11,14-Eicosadienoic acid	SOD2
11,14-Eicosadienoic acid	SORD
11,14-Eicosadienoic acid	SRC
11,14-Eicosadienoic acid	STAT1
11,14-Eicosadienoic acid	STS
11,14-Eicosadienoic acid	SULT1E1
11,14-Eicosadienoic acid	SULT2A1
11,14-Eicosadienoic acid	SULT2B1
11,14-Eicosadienoic acid	SYK
11,14-Eicosadienoic acid	TEK
11,14-Eicosadienoic acid	TGFB2
11,14-Eicosadienoic acid	TGFBR1
11,14-Eicosadienoic acid	TGM3
11,14-Eicosadienoic acid	THRA
11,14-Eicosadienoic acid	THRB
11,14-Eicosadienoic acid	TNNC1
11,14-Eicosadienoic acid	TPH1
11,14-Eicosadienoic acid	TPI1
11,14-Eicosadienoic acid	TPSB2
11,14-Eicosadienoic acid	TRAPPC3
11,14-Eicosadienoic acid	TTPA
11,14-Eicosadienoic acid	TTR
11,14-Eicosadienoic acid	TYMS
11,14-Eicosadienoic acid	UCK2
11,14-Eicosadienoic acid	VDR
11,14-Eicosadienoic acid	WARS
11,14-Eicosadienoic acid	WAS
11,14-Eicosadienoic acid	XIAP
11,14-Eicosadienoic acid	YARS
11,14-Eicosadienoic acid	ZAP70
1-Methoxyphaseollidin	ABL1
1-Methoxyphaseollidin	ABO
1-Methoxyphaseollidin	ACE
1-Methoxyphaseollidin	ADH
1-Methoxyphaseollidin	ADH1C
1-Methoxyphaseollidin	ADK
1-Methoxyphaseollidin	AKR1B1
1-Methoxyphaseollidin	AKR1C2
1-Methoxyphaseollidin	AKR1C3
1-Methoxyphaseollidin	ALB
1-Methoxyphaseollidin	AMY2A
1-Methoxyphaseollidin	AR
1-Methoxyphaseollidin	BACE1
1-Methoxyphaseollidin	BIRC7
1-Methoxyphaseollidin	BRAF
1-Methoxyphaseollidin	CA2
1-Methoxyphaseollidin	CALM1
1-Methoxyphaseollidin	CALM2
1-Methoxyphaseollidin	CALM3
1-Methoxyphaseollidin	CASP1
1-Methoxyphaseollidin	CBR1
1-Methoxyphaseollidin	CCNA2
1-Methoxyphaseollidin	CDK2
1-Methoxyphaseollidin	CHEK1
1-Methoxyphaseollidin	CRABP2
1-Methoxyphaseollidin	CTNNA1
1-Methoxyphaseollidin	CTSK
1-Methoxyphaseollidin	CTSS
1-Methoxyphaseollidin	DCK
1-Methoxyphaseollidin	DHODH
1-Methoxyphaseollidin	DPEP1
1-Methoxyphaseollidin	DPP4
1-Methoxyphaseollidin	DUT
1-Methoxyphaseollidin	ELANE
1-Methoxyphaseollidin	EPHB4
1-Methoxyphaseollidin	ESR1
1-Methoxyphaseollidin	ESR2
1-Methoxyphaseollidin	ESRRG
1-Methoxyphaseollidin	F2
1-Methoxyphaseollidin	FABP3
1-Methoxyphaseollidin	FABP6
1-Methoxyphaseollidin	FABP7
1-Methoxyphaseollidin	FECH
1-Methoxyphaseollidin	FGFR1
1-Methoxyphaseollidin	FGG
1-Methoxyphaseollidin	FKBP1A
1-Methoxyphaseollidin	GART
1-Methoxyphaseollidin	GC
1-Methoxyphaseollidin	GCK
1-Methoxyphaseollidin	GLO1
1-Methoxyphaseollidin	GPI
1-Methoxyphaseollidin	GRB2
1-Methoxyphaseollidin	GSK3B
1-Methoxyphaseollidin	GSTA1
1-Methoxyphaseollidin	GSTP1
1-Methoxyphaseollidin	GSTT2
1-Methoxyphaseollidin	HADH
1-Methoxyphaseollidin	HCK
1-Methoxyphaseollidin	HDAC8
1-Methoxyphaseollidin	HMGCR
1-Methoxyphaseollidin	HNMT
1-Methoxyphaseollidin	HSD11B1
1-Methoxyphaseollidin	HSD17B1
1-Methoxyphaseollidin	HSP90AA1
1-Methoxyphaseollidin	IL2
1-Methoxyphaseollidin	INSR
1-Methoxyphaseollidin	ITK
1-Methoxyphaseollidin	JAK2
1-Methoxyphaseollidin	JAK3
1-Methoxyphaseollidin	KDR
1-Methoxyphaseollidin	KIF11
1-Methoxyphaseollidin	KIT
1-Methoxyphaseollidin	LCK
1-Methoxyphaseollidin	LSS
1-Methoxyphaseollidin	MAOB
1-Methoxyphaseollidin	MAP2K1
1-Methoxyphaseollidin	MAPK10
1-Methoxyphaseollidin	MAPK14
1-Methoxyphaseollidin	MAPKAPK2
1-Methoxyphaseollidin	MDM2
1-Methoxyphaseollidin	MET
1-Methoxyphaseollidin	METAP2
1-Methoxyphaseollidin	MME
1-Methoxyphaseollidin	MMP13
1-Methoxyphaseollidin	MMP2
1-Methoxyphaseollidin	MMP3
1-Methoxyphaseollidin	MMP8
1-Methoxyphaseollidin	NQO1
1-Methoxyphaseollidin	NR1H2
1-Methoxyphaseollidin	NR1H3
1-Methoxyphaseollidin	NR1H4
1-Methoxyphaseollidin	NR1I2
1-Methoxyphaseollidin	NR1I3
1-Methoxyphaseollidin	NR3C1
1-Methoxyphaseollidin	NR3C2
1-Methoxyphaseollidin	PCTP
1-Methoxyphaseollidin	PDE4B
1-Methoxyphaseollidin	PDE4D
1-Methoxyphaseollidin	PDK2
1-Methoxyphaseollidin	PDPK1
1-Methoxyphaseollidin	PGF
1-Methoxyphaseollidin	PGR
1-Methoxyphaseollidin	PIK3R1
1-Methoxyphaseollidin	PIM1
1-Methoxyphaseollidin	PLA2G10
1-Methoxyphaseollidin	PLA2G2A
1-Methoxyphaseollidin	PNMT
1-Methoxyphaseollidin	PPP1CC
1-Methoxyphaseollidin	PRKACA
1-Methoxyphaseollidin	PRKCQ
1-Methoxyphaseollidin	PROCR
1-Methoxyphaseollidin	PTPN1
1-Methoxyphaseollidin	RARA
1-Methoxyphaseollidin	RARB
1-Methoxyphaseollidin	RARG
1-Methoxyphaseollidin	RBP4
1-Methoxyphaseollidin	REN
1-Methoxyphaseollidin	RORA
1-Methoxyphaseollidin	RXRA
1-Methoxyphaseollidin	RXRB
1-Methoxyphaseollidin	SEC14L2
1-Methoxyphaseollidin	SHBG
1-Methoxyphaseollidin	SRC
1-Methoxyphaseollidin	SULT2A1
1-Methoxyphaseollidin	SULT2B1
1-Methoxyphaseollidin	TEK
1-Methoxyphaseollidin	TGFB2
1-Methoxyphaseollidin	TGFBR1
1-Methoxyphaseollidin	TGM3
1-Methoxyphaseollidin	THRB
1-Methoxyphaseollidin	TPH1
1-Methoxyphaseollidin	TTPA
1-Methoxyphaseollidin	TTR
1-Methoxyphaseollidin	UCK2
1-Methoxyphaseollidin	VDR
1-Methoxyphaseollidin	ZAP70
3,9-di-O-methylnissolin	ABO
3,9-di-O-methylnissolin	ACE
3,9-di-O-methylnissolin	ADAM33
3,9-di-O-methylnissolin	ADH
3,9-di-O-methylnissolin	ADK
3,9-di-O-methylnissolin	AKR1B1
3,9-di-O-methylnissolin	AKR1C1
3,9-di-O-methylnissolin	AKR1C3
3,9-di-O-methylnissolin	ALB
3,9-di-O-methylnissolin	AMD1
3,9-di-O-methylnissolin	ANG
3,9-di-O-methylnissolin	APAF1
3,9-di-O-methylnissolin	APOA2
3,9-di-O-methylnissolin	AR
3,9-di-O-methylnissolin	BACE1
3,9-di-O-methylnissolin	BHMT
3,9-di-O-methylnissolin	BIRC7
3,9-di-O-methylnissolin	BMP2
3,9-di-O-methylnissolin	BRAF
3,9-di-O-methylnissolin	BST1
3,9-di-O-methylnissolin	CA2
3,9-di-O-methylnissolin	CASP1
3,9-di-O-methylnissolin	CBS
3,9-di-O-methylnissolin	CCNA2
3,9-di-O-methylnissolin	CDK2
3,9-di-O-methylnissolin	CHEK1
3,9-di-O-methylnissolin	CRABP2
3,9-di-O-methylnissolin	CTNNA1
3,9-di-O-methylnissolin	CTSG
3,9-di-O-methylnissolin	CTSK
3,9-di-O-methylnissolin	CYP2C9
3,9-di-O-methylnissolin	DCK
3,9-di-O-methylnissolin	DHODH
3,9-di-O-methylnissolin	DPEP1
3,9-di-O-methylnissolin	DPP4
3,9-di-O-methylnissolin	DTYMK
3,9-di-O-methylnissolin	DUSP6
3,9-di-O-methylnissolin	EGFR
3,9-di-O-methylnissolin	EIF4E
3,9-di-O-methylnissolin	ELANE
3,9-di-O-methylnissolin	ERBB4
3,9-di-O-methylnissolin	ESR1
3,9-di-O-methylnissolin	ESR2
3,9-di-O-methylnissolin	ESRRG
3,9-di-O-methylnissolin	F10
3,9-di-O-methylnissolin	F2
3,9-di-O-methylnissolin	FABP3
3,9-di-O-methylnissolin	FABP6
3,9-di-O-methylnissolin	FABP7
3,9-di-O-methylnissolin	FECH
3,9-di-O-methylnissolin	FGFR1
3,9-di-O-methylnissolin	FGG
3,9-di-O-methylnissolin	FKBP1A
3,9-di-O-methylnissolin	GC
3,9-di-O-methylnissolin	GCK
3,9-di-O-methylnissolin	GPI
3,9-di-O-methylnissolin	GSK3B
3,9-di-O-methylnissolin	GSTA1
3,9-di-O-methylnissolin	GSTM2
3,9-di-O-methylnissolin	GSTP1
3,9-di-O-methylnissolin	GSTT2
3,9-di-O-methylnissolin	HADH
3,9-di-O-methylnissolin	HMGCR
3,9-di-O-methylnissolin	HNF4G
3,9-di-O-methylnissolin	HNMT
3,9-di-O-methylnissolin	HPGDS
3,9-di-O-methylnissolin	HPRT1
3,9-di-O-methylnissolin	HRAS
3,9-di-O-methylnissolin	HSD17B1
3,9-di-O-methylnissolin	HSP90AA1
3,9-di-O-methylnissolin	IGF1
3,9-di-O-methylnissolin	IL2
3,9-di-O-methylnissolin	IMPDH2
3,9-di-O-methylnissolin	INSR
3,9-di-O-methylnissolin	KDR
3,9-di-O-methylnissolin	KIF11
3,9-di-O-methylnissolin	LCK
3,9-di-O-methylnissolin	LSS
3,9-di-O-methylnissolin	LTA4H
3,9-di-O-methylnissolin	MAOB
3,9-di-O-methylnissolin	MAPK10
3,9-di-O-methylnissolin	MAPK14
3,9-di-O-methylnissolin	MET
3,9-di-O-methylnissolin	METAP2
3,9-di-O-methylnissolin	MME
3,9-di-O-methylnissolin	MMP12
3,9-di-O-methylnissolin	MMP2
3,9-di-O-methylnissolin	MMP3
3,9-di-O-methylnissolin	MMP8
3,9-di-O-methylnissolin	MTAP
3,9-di-O-methylnissolin	MTHFD1
3,9-di-O-methylnissolin	NOS2
3,9-di-O-methylnissolin	NQO1
3,9-di-O-methylnissolin	NQO2
3,9-di-O-methylnissolin	NR1H4
3,9-di-O-methylnissolin	NR1I2
3,9-di-O-methylnissolin	NR3C1
3,9-di-O-methylnissolin	NR3C2
3,9-di-O-methylnissolin	OAT
3,9-di-O-methylnissolin	PCK1
3,9-di-O-methylnissolin	PDE4B
3,9-di-O-methylnissolin	PDE4D
3,9-di-O-methylnissolin	PDE5A
3,9-di-O-methylnissolin	PDK2
3,9-di-O-methylnissolin	PDPK1
3,9-di-O-methylnissolin	PGF
3,9-di-O-methylnissolin	PGR
3,9-di-O-methylnissolin	PIM1
3,9-di-O-methylnissolin	PNMT
3,9-di-O-methylnissolin	PPIA
3,9-di-O-methylnissolin	PPP1CC
3,9-di-O-methylnissolin	PPP5C
3,9-di-O-methylnissolin	PRKACA
3,9-di-O-methylnissolin	PROCR
3,9-di-O-methylnissolin	PTPN1
3,9-di-O-methylnissolin	PTPN11
3,9-di-O-methylnissolin	RAB5A
3,9-di-O-methylnissolin	RARA
3,9-di-O-methylnissolin	RARB
3,9-di-O-methylnissolin	RARG
3,9-di-O-methylnissolin	RBP4
3,9-di-O-methylnissolin	RFK
3,9-di-O-methylnissolin	RXRA
3,9-di-O-methylnissolin	RXRB
3,9-di-O-methylnissolin	SDS
3,9-di-O-methylnissolin	SEC14L2
3,9-di-O-methylnissolin	SERPINA1
3,9-di-O-methylnissolin	SHBG
3,9-di-O-methylnissolin	SIRT5
3,9-di-O-methylnissolin	SRC
3,9-di-O-methylnissolin	STS
3,9-di-O-methylnissolin	SULT1E1
3,9-di-O-methylnissolin	SULT2A1
3,9-di-O-methylnissolin	SULT2B1
3,9-di-O-methylnissolin	TAP1
3,9-di-O-methylnissolin	TGM3
3,9-di-O-methylnissolin	TRAPPC3
3,9-di-O-methylnissolin	TTPA
3,9-di-O-methylnissolin	TTR
3,9-di-O-methylnissolin	VDR
3-beta-Hydroxymethyllenetanshiquinone	ABL1
3-beta-Hydroxymethyllenetanshiquinone	ABO
3-beta-Hydroxymethyllenetanshiquinone	ACADM
3-beta-Hydroxymethyllenetanshiquinone	ADAM17
3-beta-Hydroxymethyllenetanshiquinone	ADAM33
3-beta-Hydroxymethyllenetanshiquinone	ADH
3-beta-Hydroxymethyllenetanshiquinone	ADH1C
3-beta-Hydroxymethyllenetanshiquinone	ADK
3-beta-Hydroxymethyllenetanshiquinone	AGXT
3-beta-Hydroxymethyllenetanshiquinone	AKR1B1
3-beta-Hydroxymethyllenetanshiquinone	AKR1C1
3-beta-Hydroxymethyllenetanshiquinone	AKR1C2
3-beta-Hydroxymethyllenetanshiquinone	AKR1C3
3-beta-Hydroxymethyllenetanshiquinone	AKT2
3-beta-Hydroxymethyllenetanshiquinone	ALB
3-beta-Hydroxymethyllenetanshiquinone	ALDH2
3-beta-Hydroxymethyllenetanshiquinone	AMD1
3-beta-Hydroxymethyllenetanshiquinone	AMY2A
3-beta-Hydroxymethyllenetanshiquinone	ANXA5
3-beta-Hydroxymethyllenetanshiquinone	APAF1
3-beta-Hydroxymethyllenetanshiquinone	APOA2
3-beta-Hydroxymethyllenetanshiquinone	AR
3-beta-Hydroxymethyllenetanshiquinone	BACE1
3-beta-Hydroxymethyllenetanshiquinone	BCAT2
3-beta-Hydroxymethyllenetanshiquinone	BCHE
3-beta-Hydroxymethyllenetanshiquinone	BCL2L1
3-beta-Hydroxymethyllenetanshiquinone	BHMT
3-beta-Hydroxymethyllenetanshiquinone	BIRC7
3-beta-Hydroxymethyllenetanshiquinone	BLVRB
3-beta-Hydroxymethyllenetanshiquinone	BMP2
3-beta-Hydroxymethyllenetanshiquinone	BRAF
3-beta-Hydroxymethyllenetanshiquinone	BST1
3-beta-Hydroxymethyllenetanshiquinone	BTK
3-beta-Hydroxymethyllenetanshiquinone	CA2
3-beta-Hydroxymethyllenetanshiquinone	CALM1
3-beta-Hydroxymethyllenetanshiquinone	CALM2
3-beta-Hydroxymethyllenetanshiquinone	CALM3
3-beta-Hydroxymethyllenetanshiquinone	CASP1
3-beta-Hydroxymethyllenetanshiquinone	CASP3
3-beta-Hydroxymethyllenetanshiquinone	CBR1
3-beta-Hydroxymethyllenetanshiquinone	CBS
3-beta-Hydroxymethyllenetanshiquinone	CCNA2
3-beta-Hydroxymethyllenetanshiquinone	CCNT1
3-beta-Hydroxymethyllenetanshiquinone	CDK2
3-beta-Hydroxymethyllenetanshiquinone	CDK6
3-beta-Hydroxymethyllenetanshiquinone	CDK7
3-beta-Hydroxymethyllenetanshiquinone	CES1
3-beta-Hydroxymethyllenetanshiquinone	CFB
3-beta-Hydroxymethyllenetanshiquinone	CFD
3-beta-Hydroxymethyllenetanshiquinone	CHEK1
3-beta-Hydroxymethyllenetanshiquinone	CHIT1
3-beta-Hydroxymethyllenetanshiquinone	CLK1
3-beta-Hydroxymethyllenetanshiquinone	CRABP2
3-beta-Hydroxymethyllenetanshiquinone	CSK
3-beta-Hydroxymethyllenetanshiquinone	CTNNA1
3-beta-Hydroxymethyllenetanshiquinone	CTSB
3-beta-Hydroxymethyllenetanshiquinone	CTSF
3-beta-Hydroxymethyllenetanshiquinone	CTSK
3-beta-Hydroxymethyllenetanshiquinone	CTSS
3-beta-Hydroxymethyllenetanshiquinone	CYP2C8
3-beta-Hydroxymethyllenetanshiquinone	CYP2C9
3-beta-Hydroxymethyllenetanshiquinone	DCK
3-beta-Hydroxymethyllenetanshiquinone	DHFR
3-beta-Hydroxymethyllenetanshiquinone	DHODH
3-beta-Hydroxymethyllenetanshiquinone	DPEP1
3-beta-Hydroxymethyllenetanshiquinone	DPP4
3-beta-Hydroxymethyllenetanshiquinone	DTYMK
3-beta-Hydroxymethyllenetanshiquinone	DUSP6
3-beta-Hydroxymethyllenetanshiquinone	DUT
3-beta-Hydroxymethyllenetanshiquinone	EGFR
3-beta-Hydroxymethyllenetanshiquinone	EIF4E
3-beta-Hydroxymethyllenetanshiquinone	ELANE
3-beta-Hydroxymethyllenetanshiquinone	EPHB4
3-beta-Hydroxymethyllenetanshiquinone	ERBB4
3-beta-Hydroxymethyllenetanshiquinone	ERRA
3-beta-Hydroxymethyllenetanshiquinone	ESR1
3-beta-Hydroxymethyllenetanshiquinone	ESR2
3-beta-Hydroxymethyllenetanshiquinone	ESRRG
3-beta-Hydroxymethyllenetanshiquinone	F10
3-beta-Hydroxymethyllenetanshiquinone	F11
3-beta-Hydroxymethyllenetanshiquinone	F2
3-beta-Hydroxymethyllenetanshiquinone	F7
3-beta-Hydroxymethyllenetanshiquinone	FABP3
3-beta-Hydroxymethyllenetanshiquinone	FABP4
3-beta-Hydroxymethyllenetanshiquinone	FABP6
3-beta-Hydroxymethyllenetanshiquinone	FABP7
3-beta-Hydroxymethyllenetanshiquinone	FDPS
3-beta-Hydroxymethyllenetanshiquinone	FECH
3-beta-Hydroxymethyllenetanshiquinone	FGFR1
3-beta-Hydroxymethyllenetanshiquinone	FGFR2
3-beta-Hydroxymethyllenetanshiquinone	FGG
3-beta-Hydroxymethyllenetanshiquinone	FKBP1A
3-beta-Hydroxymethyllenetanshiquinone	FKBP1B
3-beta-Hydroxymethyllenetanshiquinone	FKBP3
3-beta-Hydroxymethyllenetanshiquinone	FNTA
3-beta-Hydroxymethyllenetanshiquinone	FOLH1
3-beta-Hydroxymethyllenetanshiquinone	GART
3-beta-Hydroxymethyllenetanshiquinone	GC
3-beta-Hydroxymethyllenetanshiquinone	GCDH
3-beta-Hydroxymethyllenetanshiquinone	GCK
3-beta-Hydroxymethyllenetanshiquinone	GLO1
3-beta-Hydroxymethyllenetanshiquinone	GMPR2
3-beta-Hydroxymethyllenetanshiquinone	GRB2
3-beta-Hydroxymethyllenetanshiquinone	GSK3B
3-beta-Hydroxymethyllenetanshiquinone	GSR
3-beta-Hydroxymethyllenetanshiquinone	GSTA1
3-beta-Hydroxymethyllenetanshiquinone	GSTA3
3-beta-Hydroxymethyllenetanshiquinone	GSTM1
3-beta-Hydroxymethyllenetanshiquinone	GSTM2
3-beta-Hydroxymethyllenetanshiquinone	GSTP1
3-beta-Hydroxymethyllenetanshiquinone	GSTT2
3-beta-Hydroxymethyllenetanshiquinone	HCK
3-beta-Hydroxymethyllenetanshiquinone	HDAC8
3-beta-Hydroxymethyllenetanshiquinone	HMGCR
3-beta-Hydroxymethyllenetanshiquinone	HNF4G
3-beta-Hydroxymethyllenetanshiquinone	HNMT
3-beta-Hydroxymethyllenetanshiquinone	HPGDS
3-beta-Hydroxymethyllenetanshiquinone	HPRT1
3-beta-Hydroxymethyllenetanshiquinone	HRAS
3-beta-Hydroxymethyllenetanshiquinone	HSD11B1
3-beta-Hydroxymethyllenetanshiquinone	HSD17B1
3-beta-Hydroxymethyllenetanshiquinone	HSP90AA1
3-beta-Hydroxymethyllenetanshiquinone	HSP90AB1
3-beta-Hydroxymethyllenetanshiquinone	HSPA8
3-beta-Hydroxymethyllenetanshiquinone	IGF1
3-beta-Hydroxymethyllenetanshiquinone	IL2
3-beta-Hydroxymethyllenetanshiquinone	INSR
3-beta-Hydroxymethyllenetanshiquinone	ITGAL
3-beta-Hydroxymethyllenetanshiquinone	ITK
3-beta-Hydroxymethyllenetanshiquinone	IVD
3-beta-Hydroxymethyllenetanshiquinone	JAK2
3-beta-Hydroxymethyllenetanshiquinone	JAK3
3-beta-Hydroxymethyllenetanshiquinone	KAT2B
3-beta-Hydroxymethyllenetanshiquinone	KDR
3-beta-Hydroxymethyllenetanshiquinone	KIF11
3-beta-Hydroxymethyllenetanshiquinone	KIT
3-beta-Hydroxymethyllenetanshiquinone	LCK
3-beta-Hydroxymethyllenetanshiquinone	LCN2
3-beta-Hydroxymethyllenetanshiquinone	LSS
3-beta-Hydroxymethyllenetanshiquinone	LTA4H
3-beta-Hydroxymethyllenetanshiquinone	MAN1B1
3-beta-Hydroxymethyllenetanshiquinone	MAOB
3-beta-Hydroxymethyllenetanshiquinone	MAP2K1
3-beta-Hydroxymethyllenetanshiquinone	MAPK1
3-beta-Hydroxymethyllenetanshiquinone	MAPK10
3-beta-Hydroxymethyllenetanshiquinone	MAPK14
3-beta-Hydroxymethyllenetanshiquinone	MAPK8
3-beta-Hydroxymethyllenetanshiquinone	MAPKAPK2
3-beta-Hydroxymethyllenetanshiquinone	MDM2
3-beta-Hydroxymethyllenetanshiquinone	ME2
3-beta-Hydroxymethyllenetanshiquinone	MET
3-beta-Hydroxymethyllenetanshiquinone	METAP2
3-beta-Hydroxymethyllenetanshiquinone	MME
3-beta-Hydroxymethyllenetanshiquinone	MMP1
3-beta-Hydroxymethyllenetanshiquinone	MMP12
3-beta-Hydroxymethyllenetanshiquinone	MMP13
3-beta-Hydroxymethyllenetanshiquinone	MMP16
3-beta-Hydroxymethyllenetanshiquinone	MMP2
3-beta-Hydroxymethyllenetanshiquinone	MMP3
3-beta-Hydroxymethyllenetanshiquinone	MMP8
3-beta-Hydroxymethyllenetanshiquinone	MMP9
3-beta-Hydroxymethyllenetanshiquinone	MTAP
3-beta-Hydroxymethyllenetanshiquinone	MTHFD1
3-beta-Hydroxymethyllenetanshiquinone	NDST1
3-beta-Hydroxymethyllenetanshiquinone	NOS3
3-beta-Hydroxymethyllenetanshiquinone	NQO1
3-beta-Hydroxymethyllenetanshiquinone	NQO2
3-beta-Hydroxymethyllenetanshiquinone	NR1H2
3-beta-Hydroxymethyllenetanshiquinone	NR1H3
3-beta-Hydroxymethyllenetanshiquinone	NR1H4
3-beta-Hydroxymethyllenetanshiquinone	NR1I2
3-beta-Hydroxymethyllenetanshiquinone	NR1I3
3-beta-Hydroxymethyllenetanshiquinone	NR3C1
3-beta-Hydroxymethyllenetanshiquinone	NR3C2
3-beta-Hydroxymethyllenetanshiquinone	NT5M
3-beta-Hydroxymethyllenetanshiquinone	OAT
3-beta-Hydroxymethyllenetanshiquinone	OTC
3-beta-Hydroxymethyllenetanshiquinone	PAH
3-beta-Hydroxymethyllenetanshiquinone	PAK7
3-beta-Hydroxymethyllenetanshiquinone	PCK1
3-beta-Hydroxymethyllenetanshiquinone	PCTP
3-beta-Hydroxymethyllenetanshiquinone	PDE3B
3-beta-Hydroxymethyllenetanshiquinone	PDE4B
3-beta-Hydroxymethyllenetanshiquinone	PDE4D
3-beta-Hydroxymethyllenetanshiquinone	PDE5A
3-beta-Hydroxymethyllenetanshiquinone	PDK2
3-beta-Hydroxymethyllenetanshiquinone	PDPK1
3-beta-Hydroxymethyllenetanshiquinone	PFKFB1
3-beta-Hydroxymethyllenetanshiquinone	PGF
3-beta-Hydroxymethyllenetanshiquinone	PGR
3-beta-Hydroxymethyllenetanshiquinone	PIK3CG
3-beta-Hydroxymethyllenetanshiquinone	PIK3R1
3-beta-Hydroxymethyllenetanshiquinone	PIM1
3-beta-Hydroxymethyllenetanshiquinone	PLA2G10
3-beta-Hydroxymethyllenetanshiquinone	PLA2G2A
3-beta-Hydroxymethyllenetanshiquinone	PNMT
3-beta-Hydroxymethyllenetanshiquinone	PPARA
3-beta-Hydroxymethyllenetanshiquinone	PPARD
3-beta-Hydroxymethyllenetanshiquinone	PPARG
3-beta-Hydroxymethyllenetanshiquinone	PPIA
3-beta-Hydroxymethyllenetanshiquinone	PPP1CC
3-beta-Hydroxymethyllenetanshiquinone	PPP5C
3-beta-Hydroxymethyllenetanshiquinone	PRKACA
3-beta-Hydroxymethyllenetanshiquinone	PRKCQ
3-beta-Hydroxymethyllenetanshiquinone	PROCR
3-beta-Hydroxymethyllenetanshiquinone	PTPN1
3-beta-Hydroxymethyllenetanshiquinone	PTPN11
3-beta-Hydroxymethyllenetanshiquinone	RAC1
3-beta-Hydroxymethyllenetanshiquinone	RAP2A
3-beta-Hydroxymethyllenetanshiquinone	RARA
3-beta-Hydroxymethyllenetanshiquinone	RARB
3-beta-Hydroxymethyllenetanshiquinone	RARG
3-beta-Hydroxymethyllenetanshiquinone	RBP4
3-beta-Hydroxymethyllenetanshiquinone	REN
3-beta-Hydroxymethyllenetanshiquinone	RHEB
3-beta-Hydroxymethyllenetanshiquinone	RORA
3-beta-Hydroxymethyllenetanshiquinone	RXRA
3-beta-Hydroxymethyllenetanshiquinone	RXRB
3-beta-Hydroxymethyllenetanshiquinone	S100A9
3-beta-Hydroxymethyllenetanshiquinone	SDS
3-beta-Hydroxymethyllenetanshiquinone	SEC14L2
3-beta-Hydroxymethyllenetanshiquinone	SELE
3-beta-Hydroxymethyllenetanshiquinone	SERPINA1
3-beta-Hydroxymethyllenetanshiquinone	SETD7
3-beta-Hydroxymethyllenetanshiquinone	SHBG
3-beta-Hydroxymethyllenetanshiquinone	SOD2
3-beta-Hydroxymethyllenetanshiquinone	SORD
3-beta-Hydroxymethyllenetanshiquinone	SPR
3-beta-Hydroxymethyllenetanshiquinone	SRC
3-beta-Hydroxymethyllenetanshiquinone	STAT1
3-beta-Hydroxymethyllenetanshiquinone	STS
3-beta-Hydroxymethyllenetanshiquinone	SULT1E1
3-beta-Hydroxymethyllenetanshiquinone	SULT2A1
3-beta-Hydroxymethyllenetanshiquinone	SULT2B1
3-beta-Hydroxymethyllenetanshiquinone	SYK
3-beta-Hydroxymethyllenetanshiquinone	TAP1
3-beta-Hydroxymethyllenetanshiquinone	TEK
3-beta-Hydroxymethyllenetanshiquinone	TGFB2
3-beta-Hydroxymethyllenetanshiquinone	TGFBR1
3-beta-Hydroxymethyllenetanshiquinone	TGM3
3-beta-Hydroxymethyllenetanshiquinone	THRA
3-beta-Hydroxymethyllenetanshiquinone	THRB
3-beta-Hydroxymethyllenetanshiquinone	TPH1
3-beta-Hydroxymethyllenetanshiquinone	TRAPPC3
3-beta-Hydroxymethyllenetanshiquinone	TTPA
3-beta-Hydroxymethyllenetanshiquinone	TTR
3-beta-Hydroxymethyllenetanshiquinone	TYMS
3-beta-Hydroxymethyllenetanshiquinone	UCK2
3-beta-Hydroxymethyllenetanshiquinone	VDR
3-beta-Hydroxymethyllenetanshiquinone	WARS
3-beta-Hydroxymethyllenetanshiquinone	WAS
3-beta-Hydroxymethyllenetanshiquinone	XIAP
3-beta-Hydroxymethyllenetanshiquinone	YARS
3-beta-Hydroxymethyllenetanshiquinone	ZAP70
3α-hydroxytanshinone IIA	ABL1
3α-hydroxytanshinone IIA	ABO
3α-hydroxytanshinone IIA	ACADM
3α-hydroxytanshinone IIA	ACPP
3α-hydroxytanshinone IIA	ADAM17
3α-hydroxytanshinone IIA	ADAM33
3α-hydroxytanshinone IIA	ADH
3α-hydroxytanshinone IIA	ADH1C
3α-hydroxytanshinone IIA	ADK
3α-hydroxytanshinone IIA	AKR1B1
3α-hydroxytanshinone IIA	AKR1C1
3α-hydroxytanshinone IIA	AKR1C2
3α-hydroxytanshinone IIA	AKR1C3
3α-hydroxytanshinone IIA	AKT2
3α-hydroxytanshinone IIA	ALB
3α-hydroxytanshinone IIA	AMD1
3α-hydroxytanshinone IIA	AMY1A
3α-hydroxytanshinone IIA	AMY1B
3α-hydroxytanshinone IIA	AMY1C
3α-hydroxytanshinone IIA	AMY2A
3α-hydroxytanshinone IIA	ANXA5
3α-hydroxytanshinone IIA	APOA2
3α-hydroxytanshinone IIA	AR
3α-hydroxytanshinone IIA	BACE1
3α-hydroxytanshinone IIA	BCAT2
3α-hydroxytanshinone IIA	BCHE
3α-hydroxytanshinone IIA	BCL2L1
3α-hydroxytanshinone IIA	BHMT
3α-hydroxytanshinone IIA	BIRC7
3α-hydroxytanshinone IIA	BLVRB
3α-hydroxytanshinone IIA	BMP2
3α-hydroxytanshinone IIA	BRAF
3α-hydroxytanshinone IIA	BST1
3α-hydroxytanshinone IIA	CA1
3α-hydroxytanshinone IIA	CA2
3α-hydroxytanshinone IIA	CASP1
3α-hydroxytanshinone IIA	CASP3
3α-hydroxytanshinone IIA	CASP7
3α-hydroxytanshinone IIA	CBR1
3α-hydroxytanshinone IIA	CCNA2
3α-hydroxytanshinone IIA	CCNT1
3α-hydroxytanshinone IIA	CD1A
3α-hydroxytanshinone IIA	CDA
3α-hydroxytanshinone IIA	CDC42
3α-hydroxytanshinone IIA	CDK2
3α-hydroxytanshinone IIA	CDK5R1
3α-hydroxytanshinone IIA	CDK6
3α-hydroxytanshinone IIA	CES1
3α-hydroxytanshinone IIA	CFB
3α-hydroxytanshinone IIA	CFD
3α-hydroxytanshinone IIA	CHEK1
3α-hydroxytanshinone IIA	CRABP2
3α-hydroxytanshinone IIA	CSNK1G2
3α-hydroxytanshinone IIA	CTNNA1
3α-hydroxytanshinone IIA	CTSB
3α-hydroxytanshinone IIA	CTSG
3α-hydroxytanshinone IIA	CTSK
3α-hydroxytanshinone IIA	CTSL
3α-hydroxytanshinone IIA	CTSS
3α-hydroxytanshinone IIA	CYP2C8
3α-hydroxytanshinone IIA	CYP2C9
3α-hydroxytanshinone IIA	DCK
3α-hydroxytanshinone IIA	DHFR
3α-hydroxytanshinone IIA	DHODH
3α-hydroxytanshinone IIA	DPEP1
3α-hydroxytanshinone IIA	DPP4
3α-hydroxytanshinone IIA	DTYMK
3α-hydroxytanshinone IIA	DUSP6
3α-hydroxytanshinone IIA	DUT
3α-hydroxytanshinone IIA	EGFR
3α-hydroxytanshinone IIA	EIF4E
3α-hydroxytanshinone IIA	ELANE
3α-hydroxytanshinone IIA	EPHB4
3α-hydroxytanshinone IIA	ERBB4
3α-hydroxytanshinone IIA	ERRA
3α-hydroxytanshinone IIA	ESR1
3α-hydroxytanshinone IIA	ESR2
3α-hydroxytanshinone IIA	ESRRG
3α-hydroxytanshinone IIA	F10
3α-hydroxytanshinone IIA	F11
3α-hydroxytanshinone IIA	F2
3α-hydroxytanshinone IIA	F7
3α-hydroxytanshinone IIA	FABP3
3α-hydroxytanshinone IIA	FABP4
3α-hydroxytanshinone IIA	FABP6
3α-hydroxytanshinone IIA	FABP7
3α-hydroxytanshinone IIA	FDPS
3α-hydroxytanshinone IIA	FECH
3α-hydroxytanshinone IIA	FGFR1
3α-hydroxytanshinone IIA	FGFR2
3α-hydroxytanshinone IIA	FGG
3α-hydroxytanshinone IIA	FKBP1A
3α-hydroxytanshinone IIA	FKBP1B
3α-hydroxytanshinone IIA	FKBP3
3α-hydroxytanshinone IIA	FNTA
3α-hydroxytanshinone IIA	FOLH1
3α-hydroxytanshinone IIA	GART
3α-hydroxytanshinone IIA	GC
3α-hydroxytanshinone IIA	GLO1
3α-hydroxytanshinone IIA	GPI
3α-hydroxytanshinone IIA	GSK3B
3α-hydroxytanshinone IIA	GSR
3α-hydroxytanshinone IIA	GSTA1
3α-hydroxytanshinone IIA	GSTA3
3α-hydroxytanshinone IIA	GSTM1
3α-hydroxytanshinone IIA	GSTM2
3α-hydroxytanshinone IIA	GSTP1
3α-hydroxytanshinone IIA	GSTT2
3α-hydroxytanshinone IIA	HCK
3α-hydroxytanshinone IIA	HDAC8
3α-hydroxytanshinone IIA	HEXB
3α-hydroxytanshinone IIA	HMGCR
3α-hydroxytanshinone IIA	HNF4G
3α-hydroxytanshinone IIA	HNMT
3α-hydroxytanshinone IIA	HPGDS
3α-hydroxytanshinone IIA	HPN
3α-hydroxytanshinone IIA	HRAS
3α-hydroxytanshinone IIA	HSD11B1
3α-hydroxytanshinone IIA	HSD17B1
3α-hydroxytanshinone IIA	HSP90AA1
3α-hydroxytanshinone IIA	HSP90AB1
3α-hydroxytanshinone IIA	IGF1
3α-hydroxytanshinone IIA	IGF1R
3α-hydroxytanshinone IIA	IL2
3α-hydroxytanshinone IIA	INSR
3α-hydroxytanshinone IIA	ITGAL
3α-hydroxytanshinone IIA	ITK
3α-hydroxytanshinone IIA	JAK2
3α-hydroxytanshinone IIA	JAK3
3α-hydroxytanshinone IIA	KAT2B
3α-hydroxytanshinone IIA	KDR
3α-hydroxytanshinone IIA	KIF11
3α-hydroxytanshinone IIA	KIT
3α-hydroxytanshinone IIA	LCK
3α-hydroxytanshinone IIA	LCN2
3α-hydroxytanshinone IIA	LGALS7
3α-hydroxytanshinone IIA	LSS
3α-hydroxytanshinone IIA	LTA4H
3α-hydroxytanshinone IIA	LYZ
3α-hydroxytanshinone IIA	MAOB
3α-hydroxytanshinone IIA	MAP2K1
3α-hydroxytanshinone IIA	MAPK1
3α-hydroxytanshinone IIA	MAPK10
3α-hydroxytanshinone IIA	MAPK14
3α-hydroxytanshinone IIA	MAPK8
3α-hydroxytanshinone IIA	MAPKAPK2
3α-hydroxytanshinone IIA	MDM2
3α-hydroxytanshinone IIA	MET
3α-hydroxytanshinone IIA	METAP2
3α-hydroxytanshinone IIA	MIF
3α-hydroxytanshinone IIA	MME
3α-hydroxytanshinone IIA	MMP1
3α-hydroxytanshinone IIA	MMP12
3α-hydroxytanshinone IIA	MMP13
3α-hydroxytanshinone IIA	MMP2
3α-hydroxytanshinone IIA	MMP3
3α-hydroxytanshinone IIA	MMP8
3α-hydroxytanshinone IIA	MMP9
3α-hydroxytanshinone IIA	MTAP
3α-hydroxytanshinone IIA	MTHFD1
3α-hydroxytanshinone IIA	NMNAT1
3α-hydroxytanshinone IIA	NOS2
3α-hydroxytanshinone IIA	NOS3
3α-hydroxytanshinone IIA	NQO1
3α-hydroxytanshinone IIA	NQO2
3α-hydroxytanshinone IIA	NR1H2
3α-hydroxytanshinone IIA	NR1H3
3α-hydroxytanshinone IIA	NR1H4
3α-hydroxytanshinone IIA	NR1I2
3α-hydroxytanshinone IIA	NR3C1
3α-hydroxytanshinone IIA	NR3C2
3α-hydroxytanshinone IIA	NT5M
3α-hydroxytanshinone IIA	OAT
3α-hydroxytanshinone IIA	PADI4
3α-hydroxytanshinone IIA	PAH
3α-hydroxytanshinone IIA	PARP1
3α-hydroxytanshinone IIA	PCK1
3α-hydroxytanshinone IIA	PCTP
3α-hydroxytanshinone IIA	PDE3B
3α-hydroxytanshinone IIA	PDE4B
3α-hydroxytanshinone IIA	PDE4D
3α-hydroxytanshinone IIA	PDE5A
3α-hydroxytanshinone IIA	PDK2
3α-hydroxytanshinone IIA	PDPK1
3α-hydroxytanshinone IIA	PGF
3α-hydroxytanshinone IIA	PGR
3α-hydroxytanshinone IIA	PIK3R1
3α-hydroxytanshinone IIA	PIM1
3α-hydroxytanshinone IIA	PLA2G10
3α-hydroxytanshinone IIA	PLA2G2A
3α-hydroxytanshinone IIA	PLK1
3α-hydroxytanshinone IIA	PNMT
3α-hydroxytanshinone IIA	PPARA
3α-hydroxytanshinone IIA	PPARD
3α-hydroxytanshinone IIA	PPARG
3α-hydroxytanshinone IIA	PPIA
3α-hydroxytanshinone IIA	PPP1CC
3α-hydroxytanshinone IIA	PPP5C
3α-hydroxytanshinone IIA	PRKACA
3α-hydroxytanshinone IIA	PRKCQ
3α-hydroxytanshinone IIA	PROCR
3α-hydroxytanshinone IIA	PTPN1
[truncated: 34,271 more rows]
