# Supplementary material for: Network Pharmacology-Based Strategy Reveals the Effects of Hedysarum multijugum Maxim.-Radix Salviae Compound on Oxidative Capacity and Cardiomyocyte Apoptosis in Rats with Diabetic Cardiomyopathy
Source: Biomed Res Int. 2020 Oct 17;2020:8260703. doi: 10.1155/2020/8260703 (PMC7591987; doi:10.1155/2020/8260703)
Supplement: Supplementary 2 — Table S2: diabetic cardiomyopathy genes. [file 8260703.f2.xlsx]

## Sheet: Sheet1
Table S2 Diabetic Cardiomyopathy Genes
TFR2
HFE
SLC40A1
FTH1
BMP2
HAMP
HJV
BMP6
HMOX1
B2M
SERPINA1
TF
FTL
SLC11A2
TFRC
ATP7B
CP
FXN
HBB
UROD
HLA-B
ACO1
HP
TMPRSS6
IREB2
FCGRT
MR1
HEPH
CYBRD1
INS
ADIPOQ
LOC399900
PIM1
ATP2A2
NFE2L2
CYP2J2
CRP
LEP
SIRT1
KEAP1
SOCS3
SOCS1
ITGA11
TNF
TLR4
CA2
GADD45A
CA1
NPPB
CSF3
CD36
AGER
KLK1
DPP4
SLC2A4
MMP2
AGT
ACE
IGF1R
SOD2
HSPD1
EDNRA
MYH7
PDK4
KNG1
RGS4
HSPE1
EDN2
BDKRB2
BDKRB1
PRKCB
TERF2IP
PPARA
INHBA
NOS3
MIF
ATP2A3
FOXO1
AHSG
NOTCH2
ETS1
SLC5A1
DUSP1
VIPR1
APOB
MT2A
NOD1
ELAVL1
RBFOX2
SLC9C1
GRK2
SRXN1
MIR9-1
MIR9-3
MIR18A
MIR9-2
PPARG
PRKAA1
STK11
MIR451A
ICAM1
LPL
SERPINE1
IGF1
BDNF
CAMK2D
TNFSF11
BECN1
ESRRA
MAOA
SLC5A2
TNFRSF11B
PON1
ANGPTL4
KL
RBP4
S1PR1
ESRRG
S1PR3
MGP
HBA1
BRAP
LPA
HSFX1
MIR27A
MIR143
MIR146A
MIR128-1
EDN1
TP53
SLC9A1
HDAC1
MAPK14
AGTR1
KCNH2
MAPK8
YWHAQ
TXN
SOD1
GJA1
CDKN2A
CAT
FN1
CTGF
GNAQ
PROC
IL1B
CCL2
NOS1
NR1H2
AKR1B1
MMP7
CAMK2G
NR1H3
RHOA
SPP1
HMGCR
MTTP
TXN2
APLNR
RETN
NDUFS4
MYL9
ALDH9A1
RLN2
TXNIP
RLN3
APLN
TOR2A
APOO
LOC108510657
