# Supplementary material for: Network Pharmacology-Based Strategy Reveals the Effects of Hedysarum multijugum Maxim.-Radix Salviae Compound on Oxidative Capacity and Cardiomyocyte Apoptosis in Rats with Diabetic Cardiomyopathy
Source: Biomed Res Int. 2020 Oct 17;2020:8260703. doi: 10.1155/2020/8260703 (PMC7591987; doi:10.1155/2020/8260703)
Supplement: Supplementary 3 — Table S3: enrichment analysis of clusters based on Gene Ontology (GO) annotation of the HDC-DCM PPI network. [file 8260703.f3.xlsx]

## Sheet: Sheet1
Table S3 Enrichment analysis of clusters based on Gene Ontology (GO) annotation of HDC-DCM PPI Network
Term	Biological Processes	Count	%	Pvalue	Genes	Fold Enrichment	Bonferroni
GO:0043066	negative regulation of apoptotic process	63	0.0728088	1.83569e-21	PPARD, MMP9, PRDX5, FOXO1, PRDX2, AURKA, AKT1, CASP3, FXN, BAG1, LTF, RARA, CAT, RARB, NQO1, DPEP1, EGFR, RARG, BRAF, SOCS3, TP53, PIM1, PROC, NME2, MDM2, MAPK8, SLC40A1, GSTP1, XIAP, ERBB4, BCL2L1, SRC, MIF, IGF1R, PTK2, ALB, TEK, TGM2, GLO1, PRKAA1, PIK3R1, NR1H4, ANGPTL4, HPN, BECN1, HCK, BIRC7, IGF1, RAF1, ANXA5, SIRT1, KDR, SOD2, LEP, NOTCH2, DUSP1, HDAC1, PLK1, GSK3B, ARF4, HSPD1, SLC9A1, I…	4.12242	7.19772e-18
GO:0001666	response to hypoxia	39	0.0450721	7.58348e-21	PPARA, ALAD, CCL2, AHCY, PGF, TXN2, MMP2, TGFB2, SLC11A2, EDNRA, CASP3, ANG, HMOX1, TEK, CAMK2D, PRKAA1, CAT, NOS2, CASP1, DPP4, ANGPTL4, PLAT, BMP2, NOS1, BECN1, TGFBR2, RAF1, F7, AGER, ADIPOQ, PRKCB, SOD2, LEP, ETS1, PKLR, ADAM17, APAF1, HSPD1, PLAU	6.75087	2.97348e-17
GO:0043401	steroid hormone mediated signaling pathway	24	0.0277367	1.36253e-19	PPARA, PPARD, ESRRA, THRA, RARG, THRB, RXRB, RXRA, PPARG, NR3C2, ESRRG, ESR1, RORA, HNF4G, PGR, NR1H2, VDR, NR1I3, NR1I2, RARA, RARB, BMP7, NR1H4, NR1H3	12.536	5.34246e-16
GO:0006879	cellular iron ion homeostasis	20	0.0231139	4.40945e-17	TF, ACO1, TFR2, IREB2, HFE, SOD1, TMPRSS6, FTH1, SLC11A2, LCN2, TFRC, FXN, HAMP, HMOX1, CYBRD1, HEPH, CP, SLC40A1, FTL, BMP6	13.5332	1.72894e-13
GO:0014068	positive regulation of phosphatidylinositol 3-kinase signaling	20	0.0231139	2.08785e-13	CSF3, SELP, FGFR1, PPARD, ERBB4, BECN1, IGF1, KIT, CCL5, SIRT1, KDR, TGFB2, LEP, PTK2, INS, AGT, TEK, F2, JAK2, CAT	9.16094	8.18834e-10
GO:0032869	cellular response to insulin stimulus	21	0.0242696	5.72687e-13	KAT2B, CCL2, PPARG, PDE3B, FOXO1, STAT1, ADIPOQ, SRC, APRT, PCK1, AKT1, PDPK1, SLC2A4, GCK, PKLR, PARP1, INSR, GSTP1, PIK3R1, SLC9A1, AKT2	8.11992	2.24537e-09
GO:0008284	positive regulation of cell proliferation	50	0.0577848	1.22235e-12	HRAS, PGF, EDN2, EDN1, VIPR1, TGFB2, AKR1C3, S1PR3, AKR1C2, CSNK2A1, FXN, CTGF, RARA, RARB, FGF1, INSR, APLN, DPP4, EGFR, AR, RARG, CDK2, MAPK1, F2, MDM2, ADAM17, FGFR2, CSF3, FGFR1, ERBB4, BCL2L1, KIT, IGF1R, PTK2, REG1A, RAC2, INS, PRKAA1, FN1, TGFBR1, HCK, TGFBR2, IGF1, SIRT1, KDR, LEP, DOT1L, HDAC1, ETS1, IL2	3.19453	4.79286e-09
GO:0055114	oxidation-reduction process	57	0.0658746	2.18978e-12	LDHB, GMPR2, CYP2J2, HMGCR, PRDX5, PRDX2, AKR1C3, MTHFD1, AKR1C2, GSR, SPR, NOS3, NOS2, NQO1, IMPDH1, AKR1C1, IMPDH2, NQO2, ACADM, GMPR, G6PD, NNT, TXN, CYBRD1, HSD11B1, TPH1, SRXN1, ALDH9A1, HSD17B11, ME2, SORD, HSD17B1, TXN2, PAH, FTH1, CBR1, DHODH, PNPO, GSTO1, GLRX, CYP19A1, BMP2, NOS1, CYP2C9, CYP2C8, MAOA, MAOB, CRYZ, SOD1, SOD2, DHFR, AKR1B1, BLVRB, HEPH, CP, DCXR, CBS	2.86666	8.58622e-09
GO:0045429	positive regulation of nitric oxide biosynthetic process	16	0.0184911	4.02527e-12	HSP90AB1, EGFR, ICAM1, TNF, HSP90AA1, EDN1, ESR1, TLR4, SOD2, AKT1, INS, AGT, IL1B, JAK2, INSR, HBB	11.0783	1.57829e-08
GO:2000379	positive regulation of reactive oxygen species metabolic process	14	0.0161797	4.18774e-12	GRB2, TGFBR2, TP53, AKR1C3, LEP, AGTR1, CD36, AGT, MAPK14, F2, ACE2, NFE2L2, GADD45A, NQO2	13.8941	1.64202e-08
GO:0045471	response to ethanol	23	0.026581	4.38595e-12	CSF3, ICAM1, RBP4, ALAD, CCL2, FECH, HMGCR, MAOB, SPARC, SOD1, ADIPOQ, LEP, TYMS, G6PD, SLC2A4, HAMP, ARSA, SETD7, RARA, CAT, NQO1, GSTP1, IL2	6.52172	1.71973e-08
GO:0006006	glucose metabolic process	19	0.0219582	4.45422e-12	PDK2, PPARD, TNF, SORD, GNPDA1, GNPDA2, PDK4, ADIPOQ, PDHB, PCK1, LEP, AKT1, G6PD, INS, MAPK14, PRKAA1, FABP5, DCXR, AKT2	8.4431	1.7465e-08
GO:0071222	cellular response to lipopolysaccharide	23	0.026581	2.05567e-11	CSF3, ICAM1, PPARD, TNF, CCL2, TLR4, PDE4D, SRC, B2M, LCN2, ARG1, CD36, HAMP, MAPK14, PDE4B, SERPINE1, RARA, MAPK8, NOS2, ABL1, NR1H4, GSTP1, NR1H3	6.06	8.06027e-08
GO:0000165	MAPK cascade	34	0.0392936	5.96654e-11	FGFR2, FGFR1, HRAS, CCL2, TNF, NDST1, ERBB4, GRB2, CAMK2G, MAPKAPK2, KIT, CCL5, PTK2, INS, TEK, CAMK2D, IL1B, FGF1, EGFR, MAP2K1, BRAF, KL, RAF1, BRAP, MAPK1, MAPK12, CALM3, JAK2, JAK3, CALM2, PPP5C, DUSP6, CALM1, IL2	3.86368	2.33948e-07
GO:0048661	positive regulation of smooth muscle cell proliferation	17	0.0196468	7.87577e-11	FGFR2, EGFR, TNF, HMGCR, ELANE, TGFBR2, EDN1, IGF1, STAT1, CCL5, AKT1, RETN, S1PR1, HMOX1, AKR1B1, TGM2, CAMK2D	8.4357	3.08809e-07
GO:0001525	angiogenesis	31	0.0358266	8.77924e-11	FGFR2, FGFR1, CCL2, PGF, PDE3B, RORA, MMP2, EPHB4, TGFB2, WARS, PTK2, TYMP, S1PR1, ANG, CTGF, HMOX1, FAP, TEK, SERPINE1, NOS3, FGF1, ANGPTL4, SYK, FN1, PIK3CG, SIRT1, TMPRSS6, KDR, LEP, GPI, MAPK14	4.13885	3.44234e-07
GO:0070374	positive regulation of ERK1 and ERK2 cascade	27	0.0312038	1.77993e-10	FGFR2, HRAS, CCL2, TNF, ERBB4, HMGCR, TLR4, CCL5, SRC, MIF, FGG, NOD1, CTGF, TEK, CAMK2D, FGF1, NQO2, EGFR, ICAM1, BMP2, MAP2K1, BRAF, KDR, PTPN11, CD36, PLA2G2A, ABL1	4.59356	6.97912e-07
GO:0042127	regulation of cell proliferation	27	0.0312038	6.16505e-10	TNF, XIAP, CHEK1, KIT, SRC, BTK, AGTR1, TNFRSF11B, PTK2, AGT, NOS2, CSK, TXNIP, ITK, RBFOX2, ESRRA, BRAF, TGFBR2, BIRC7, SIRT1, TFRC, LCK, ACE2, JAK2, TNK2, ABL1, PLAU	4.34526	2.41731e-06
GO:0050900	leukocyte migration	22	0.0254253	6.50832e-10	ICAM1, ITGAL, SELP, HRAS, GRB2, MMP9, MMP1, SRC, PROC, PTPN11, MIF, APOB, PROCR, PPIA, PDE4B, LCK, F2, TEK, TREM1, SELE, PIK3R1, FN1	5.36891	2.55191e-06
GO:0043627	response to estrogen	16	0.0184911	2.7847e-09	HSP90AA1, PPARG, TGFBR2, DTYMK, ESR1, F7, CTNNA1, MAPK1, TNFRSF11B, APOA2, HMOX1, TEK, ARSA, CA2, HSPD1, GBA	7.32875	1.09187e-05
GO:0006749	glutathione metabolic process	15	0.0173354	3.06476e-09	GSTA1, GSTA3, GSTT2, CLIC1, SOD1, SOD2, GSTM1, GSTM2, GSR, G6PD, GSTZ1, GLO1, GSTO1, GSTP1, DPEP1	7.97492	1.20169e-05
GO:0048015	phosphatidylinositol-mediated signaling	19	0.0219582	1.36117e-08	FGFR2, PIK3CG, EGFR, FGFR1, ERBB4, KL, GRB2, NCS1, IGF1, NPR3, KIT, PTPN11, AKT1, IGF1R, PDPK1, LCK, RHOA, FGF1, PIK3R1	5.33668	5.33702e-05
GO:0050729	positive regulation of inflammatory response	16	0.0184911	1.52436e-08	EGFR, LPL, CCL2, S100A9, TLR4, CCL5, AGTR1, ETS1, AGT, SERPINE1, TGM2, PLA2G2A, FABP4, JAK2, HSPD1, IL2	6.5256	5.97682e-05
GO:0006954	inflammatory response	37	0.0427607	1.96577e-08	ITGAL, CCL2, TNF, NDST1, S100A9, CRP, PRDX5, TLR4, BDKRB1, MAPKAPK2, BDKRB2, KIT, CCL5, MIF, AKT1, S1PR3, TNFRSF11B, NOD1, RAC1, ZAP70, IL1B, NR1H4, SPP1, SYK, PIK3CG, KNG1, SELP, BMP2, HCK, LYZ, EPHX2, AGER, EPHA2, PRKCQ, NFE2L2, SELE, BMP6	2.9066	7.70748e-05
GO:0008217	regulation of blood pressure	15	0.0173354	2.439e-08	PPARG, EDN1, EPHX2, NPR3, SOD1, SOD2, LEP, EDNRA, ACE, AGT, HMOX1, REN, NPPB, NOS3, HBB	6.8707	9.56288e-05
GO:0007165	signal transduction	76	0.0878328	2.82674e-08	HRAS, IMPA1, PGF, HINT1, PPARG, S100A9, CRABP2, PDE3B, GJA1, ITPKA, CANT1, PGR, EDNRA, AKT1, TNFRSF11B, CSNK2A1, NOD1, PDE4B, ARHGAP1, IL1B, RARA, RARB, CASP1, FGF1, APLN, AKT2, EGFR, AR, YARS, HSP90AA1, CSNK1G2, RAN, ESR1, PDE4D, CLIC1, ESR2, DAPK1, PRKCB, MAPK1, TXN, PDE5A, ITGAL, CCL2, ERBB4, NR3C2, NR3C1, KIT, SRC, IGF1R, VDR, FGG, RAC2, TEK, PRKAA1, MR1, NR1H4, HPGDS, PIK3R1, ITK, MAP2K1, TG…	1.94897	0.00011083
GO:0042593	glucose homeostasis	18	0.0208025	3.94262e-08	RBP4, PDK2, STK11, PPARG, PDK4, ADIPOQ, PCK1, PTPN11, LEP, AKT1, GPI, SLC2A4, GCK, INS, PYGL, PRKAA1, INSR, NR1H4	5.30609	0.000154578
GO:0030168	platelet activation	19	0.0219582	5.06111e-08	PIK3CG, RAF1, SRC, PRKCB, PTPN11, AKT1, PRKCQ, MAPK1, PDPK1, FGG, RAC2, GNAQ, LCK, RAC1, F2, RHOA, GP1BA, PIK3R1, SYK	4.91903	0.000198426
GO:0043406	positive regulation of MAP kinase activity	14	0.0161797	5.79373e-08	PIK3CG, EGFR, FGFR1, HRAS, TNF, ELANE, EDN1, KIT, SRC, MIF, TNFSF11, PDE5A, CSK, FGF1	7.06479	0.000227146
GO:0006809	nitric oxide biosynthetic process	8	0.00924556	6.60816e-08	AKT1, NOS1, ARG2, SPR, NOS3, RORA, NOS2, NQO1	18.3219	0.000259072
GO:0015758	glucose transport	11	0.0127126	7.64995e-08	EDNRA, AKT1, PPARD, BRAF, GCK, SLC2A4, INS, SLC5A1, EDN1, HK1, FABP5	9.92435	0.00029991
GO:0050999	regulation of nitric-oxide synthase activity	10	0.011557	9.42483e-08	LEP, AKT1, EGFR, HSP90AA1, CALM3, IL1B, SPR, NOS3, CALM2, CALM1	11.4512	0.000369479
GO:0000187	activation of MAPK activity	18	0.0208025	9.49801e-08	BMP2, TNF, MAP2K1, IGF1, TLR4, MAPK10, MAPKAPK2, KIT, SOD1, PTPN11, MAPK1, NOD1, MAPK14, IL1B, PRKAA1, FGF1, INSR, DUSP6	5.00855	0.000372348
GO:0071456	cellular response to hypoxia	17	0.0196468	1.14044e-07	ICAM1, PPARD, EDN1, TP53, RORA, SIRT1, SRC, PCK1, AKT1, SLC2A4, HMOX1, MDM2, PRKAA1, NFE2L2, BMP7, CCNA2, SLC9A1	5.27231	0.000447066
GO:0051000	positive regulation of nitric-oxide synthase activity	9	0.0104013	3.20716e-07	AKT1, NOD1, DHFR, INS, ESR1, CALM3, NPR3, CALM2, CALM1	12.1799	0.00125674
GO:0008285	negative regulation of cell proliferation	35	0.0404493	5.44194e-07	HRAS, ERBB4, STK11, FTH1, TGFB2, WARS, AZGP1, VDR, CDKN2A, BCHE, IL1B, RARA, NOS3, RARB, CSK, AR, BMP2, KAT2B, RARG, MAP2K1, BECN1, TP53, RAF1, CDK6, PLG, SOD2, NOTCH2, INHBA, HDAC1, ETS1, FABP3, JAK2, BMP7, FABP7, FABP6	2.63146	0.00213151
GO:0034599	cellular response to oxidative stress	13	0.015024	1.20016e-06	TXN2, FOXO1, PRDX2, HSPA1A, SLC11A2, NME2, G6PD, HDAC1, ATP2A2, NFE2L2, PARP1, ABL1, SRXN1	6.04765	0.00469478
GO:0010881	regulation of cardiac muscle contraction by regulation of the release of sequestered calcium ion	8	0.00924556	1.62755e-06	GSTM2, CAMK2D, CALM3, PRKACA, GSTO1, FKBP1B, CALM2, CALM1	12.536	0.00636129
GO:0030593	neutrophil chemotaxis	13	0.015024	1.69243e-06	PIK3CG, CCL2, LGALS3, EDN2, PDE4B, S100A9, EDN1, IL1B, PDE4D, TREM1, CCL5, SYK, TGFB2	5.86439	0.00661404
GO:0032355	response to estradiol	15	0.0173354	1.91733e-06	TXNIP, ESRRA, ESR1, F7, LEP, GPI, CASP3, DUSP1, CTGF, ETS1, RARA, CAT, NQO1, BMP7, GSTP1	4.90765	0.00748966
GO:0007173	epidermal growth factor receptor signaling pathway	12	0.0138683	2.06586e-06	EGFR, PTK2, PDPK1, HRAS, GRB2, ARF4, ADAM17, ABL1, CSK, PIK3R1, SRC, PTPN11	6.37994	0.00806754
GO:0051092	positive regulation of NF-kappaB transcription factor activity	18	0.0208025	2.25092e-06	ICAM1, AR, TNF, S100A9, HSPA1A, TLR4, TERF2IP, AGER, PRKCB, BTK, PRKCQ, TNFSF11, NOD1, INS, AGT, LTF, IL1B, CAT	4.02944	0.00878702
GO:0009749	response to glucose	13	0.015024	2.35523e-06	TXNIP, LPL, CASP3, APOA2, PPARD, TXN2, CTGF, TGFBR2, PKLR, GJA1, ADIPOQ, FKBP1B, CTSV	5.69191	0.00919238
GO:0070301	cellular response to hydrogen peroxide	12	0.0138683	2.48333e-06	LCN2, ARG1, FXN, ETS1, AKR1B1, FOXO1, MDM2, PRKAA1, NFE2L2, ABL1, SIRT1, PPP5C	6.26801	0.00968988
GO:2000352	negative regulation of endothelial cell apoptotic process	9	0.0104013	2.60905e-06	ICAM1, FGG, BRAF, SERPINE1, TEK, NFE2L2, ABL1, KDR, ANGPTL4	9.56991	0.0101779
GO:0043065	positive regulation of apoptotic process	28	0.0323595	3.33086e-06	TNF, ERBB4, FOXO1, BCL2L1, SRC, AKT1, CDKN2A, HMOX1, RAC1, TGM2, DHODH, RARB, TXNIP, KNG1, BMP2, RARG, TP53, SOD1, SIRT1, DUSP1, MAPK8, HSPD1, APAF1, ABL1, BMP7, GADD45A, SLC9A1, DUSP6	2.77882	0.0129754
GO:0048010	vascular endothelial growth factor receptor signaling pathway	13	0.015024	4.39824e-06	CDC42, PTK2, CCL2, HSP90AA1, MAPK12, PGF, MAPK14, RAC1, RHOA, MAPKAPK2, PIK3R1, SRC, KDR	5.37569	0.0170977
GO:0046326	positive regulation of glucose import	9	0.0104013	4.63054e-06	AKT1, INS, MAPK14, IGF1, NFE2L2, ADIPOQ, INSR, PIK3R1, AKT2	8.93191	0.0179926
GO:1904707	positive regulation of vascular smooth muscle cell proliferation	7	0.00808987	5.34683e-06	AGT, MMP9, DDX39B, MDM2, JAK2, MMP2, NQO2	13.8941	0.0207467
GO:0045766	positive regulation of angiogenesis	16	0.0184911	6.86667e-06	PGF, TGFBR2, SIRT1, KDR, PRKCB, ETS1, HMOX1, TEK, SERPINE1, RLN2, IL1B, CMA1, NOS3, NFE2L2, FGF1, ANGPTL4	4.14234	0.0265651
GO:0042632	cholesterol homeostasis	12	0.0138683	8.09358e-06	NR1H2, LPL, APOA2, APOB, PLA2G10, FABP3, EPHX2, FABP4, SIRT1, AKR1C1, MTTP, NR1H3	5.58245	0.0312368
GO:0010744	positive regulation of macrophage derived foam cell differentiation	7	0.00808987	8.31286e-06	AGTR1, LPL, APOB, CD36, PLA2G10, AGT, PLA2G2A	13.0257	0.0320694
GO:0010613	positive regulation of cardiac muscle hypertrophy	7	0.00808987	8.31286e-06	AGT, EDN1, PDE5A, CAMK2D, IGF1, PARP1, SLC9A1	13.0257	0.0320694
GO:0014066	regulation of phosphatidylinositol 3-kinase signaling	13	0.015024	1.03559e-05	EGFR, FGFR2, AKT1, MAPK1, FGFR1, ERBB4, KL, GRB2, LCK, KIT, FGF1, PIK3R1, PTPN11	4.96217	0.0397923
GO:0045893	positive regulation of transcription, DNA-templated	38	0.0439164	1.15241e-05	PPARA, PPARD, TNF, ERBB4, PPARG, FOXO1, RORA, SEC14L2, SRC, NR1H2, CDKN2A, AGT, IL1B, RARA, CCNA2, INSR, NR1H3, AR, BMP2, NOS1, MAP2K1, RAN, TGFBR1, TP53, ESRRG, ESR1, IGF1, ESR2, CDK7, STAT1, CDK2, MAPK1, INHBA, NR1I2, HDAC1, ETS1, SETD7, BMP7	2.19685	0.0441804
GO:0050728	negative regulation of inflammatory response	13	0.015024	1.18444e-05	PPARA, PPARD, SOCS3, ELANE, RORA, ADIPOQ, PROC, ETS1, TEK, NR1H4, IL2, GBA, NR1H3	4.89936	0.0453804
GO:0007159	leukocyte cell-cell adhesion	8	0.00924556	1.30297e-05	ICAM1, ITGAL, SELP, CD209, CCL5, SELE, CLEC4M, SYK	9.52738	0.0498065
GO:0043410	positive regulation of MAPK cascade	13	0.015024	1.53918e-05	LEP, FGFR2, FGFR1, AR, HRAS, BMP2, TNFRSF11B, INS, PSAP, IGF1, KIT, INSR, KDR	4.77839	0.0585665
GO:0032148	activation of protein kinase B activity	8	0.00924556	1.73174e-05	PDPK1, ANG, INS, TXN, IGF1, FGF1, INSR, SRC	9.16094	0.065648
GO:0071281	cellular response to iron ion	5	0.00577848	1.77744e-05	TF, TFR2, HFE, BMP6, B2M	24.8109	0.0673207
GO:0071356	cellular response to tumor necrosis factor	15	0.0173354	1.83958e-05	ICAM1, CCL2, EDN1, RORA, CCL5, SIRT1, PCK1, LCN2, APOB, HDAC1, SLC2A4, HAMP, FABP4, NFE2L2, GBA	4.05996	0.0695906
GO:0006919	activation of cysteine-type endopeptidase activity involved in apoptotic process	13	0.015024	1.98331e-05	TNF, PPARG, S100A9, SLC11A2, CASP3, NOD1, CDKN2A, LCK, HSPE1, JAK2, HSPD1, APAF1, CASP1	4.66325	0.0748195
