# Supplementary material for: Network Pharmacology-Based Strategy Reveals the Effects of Hedysarum multijugum Maxim.-Radix Salviae Compound on Oxidative Capacity and Cardiomyocyte Apoptosis in Rats with Diabetic Cardiomyopathy
Source: Biomed Res Int. 2020 Oct 17;2020:8260703. doi: 10.1155/2020/8260703 (PMC7591987; doi:10.1155/2020/8260703)
Supplement: Supplementary 4 — Table S4: pathway enrichment analysis of the HDC-DCM PPI network. [file 8260703.f4.xlsx]

## Sheet: Sheet1
Table S4 Pathway enrichment analysis of HDC-DCM PPI Network
Term	Pathway	Count	%	Pvalue	Genes	Fold Enrichment	Bonferroni
hsa04068	FoxO signaling pathway	37	0.0427607	1.83051e-13	HRAS, GRB2, STK11, FOXO1, TGFB2, AKT1, IGF1R, PDPK1, S1PR1, SLC2A4, INS, PRKAA1, CAT, INSR, PIK3R1, AKT2, PIK3CG, EGFR, BRAF, MAP2K1, TGFBR1, TGFBR2, RAF1, IGF1, MAPK10, SIRT1, CDK2, PCK1, SOD2, MAPK1, MAPK12, PLK1, MAPK14, MDM2, SETD7, MAPK8, GADD45A	4.11131	4.96135e-11
hsa04910	Insulin signaling pathway	35	0.0404493	1.27324e-11	HRAS, GRB2, PDE3B, FOXO1, HK1, AKT1, PDPK1, SLC2A4, INS, PRKAA1, PRKACA, INSR, PIK3R1, AKT2, PIK3CG, BRAF, MAP2K1, SOCS3, SOCS1, RAF1, MAPK10, PPP1CC, PCK1, MAPK1, EIF4E, GCK, PYGL, GSK3B, PKLR, RHEB, CALM3, MAPK8, PTPN1, CALM2, CALM1	3.77635	3.45047e-09
hsa04014	Ras signaling pathway	44	0.0508506	2.23749e-10	FGFR2, FGFR1, HRAS, GRB2, PGF, BCL2L1, KIT, PAK6, AKT1, CDC42, IGF1R, RAC2, INS, RAC1, TEK, ZAP70, RHOA, PRKACA, FGF1, INSR, PIK3R1, AKT2, PIK3CG, EGFR, PLA2G10, MAP2K1, MET, RAF1, IGF1, MAPK10, BRAP, EPHA2, KDR, PRKCB, PTPN11, MAPK1, ETS1, RAB5A, PLA2G2A, CALM3, MAPK8, ABL1, CALM2, CALM1	2.89886	6.06359e-08
hsa04066	HIF-1 signaling pathway	26	0.0300481	2.05712e-09	EGFR, PIK3CG, TF, MAP2K1, CAMK2G, EDN1, IGF1, HK1, TLR4, PDHB, PRKCB, AKT1, MAPK1, IGF1R, EIF4E, TFRC, INS, HMOX1, TEK, SERPINE1, CAMK2D, NOS3, NOS2, INSR, PIK3R1, AKT2	4.0326	5.57481e-07
hsa04915	Estrogen signaling pathway	25	0.0288924	2.01927e-08	HSP90AB1, PIK3CG, EGFR, HRAS, HSP90AA1, MAP2K1, GRB2, MMP9, ESR1, RAF1, HSPA1A, ESR2, MMP2, SRC, AKT1, MAPK1, GNAQ, CALM3, NOS3, PRKACA, HSPA8, PIK3R1, CALM2, CALM1, AKT2	3.76	5.47221e-06
hsa04931	Insulin resistance	26	0.0300481	2.77359e-08	PPARA, TNF, FOXO1, AKT1, NR1H2, PDPK1, SLC2A4, INS, PRKAA1, NOS3, INSR, PIK3R1, NR1H3, AKT2, PIK3CG, SOCS3, MAPK10, PPP1CC, PTPN11, PCK1, PRKCQ, CD36, PYGL, GSK3B, MAPK8, PTPN1	3.58454	7.5164e-06
hsa03320	PPAR signaling pathway	20	0.0231139	4.09664e-08	LPL, PPARA, PPARD, ACADM, RXRB, RXRA, PPARG, ADIPOQ, MMP1, PCK1, PDPK1, APOA2, CD36, FABP3, FABP4, FABP7, FABP5, NR1H3, FABP6, ANGPTL4	4.44466	1.11018e-05
hsa04370	VEGF signaling pathway	19	0.0219582	4.73851e-08	PIK3CG, HRAS, MAP2K1, RAF1, MAPKAPK2, SRC, KDR, PRKCB, AKT1, CDC42, MAPK1, PTK2, RAC2, MAPK12, MAPK14, RAC1, NOS3, PIK3R1, AKT2	4.63775	1.28413e-05
hsa04151	PI3K-Akt signaling pathway	51	0.0589405	1.14284e-07	HSP90AB1, HRAS, PGF, TLR4, AKT1, PDPK1, NOS3, FGF1, INSR, SYK, AKT2, PIK3CG, EGFR, HSP90AA1, RXRA, TP53, CDK6, CDK2, MAPK1, MDM2, FGFR2, CSF3, FGFR1, STK11, GRB2, ITGA11, BCL2L1, KIT, IGF1R, PTK2, INS, RAC1, TEK, PRKAA1, PIK3R1, SPP1, FN1, MAP2K1, MET, IGF1, RAF1, EPHA2, KDR, PCK1, EIF4E, GSK3B, YWHAQ, RHEB, JAK2, JAK3, IL2	2.20107	3.09704e-05
hsa04012	ErbB signaling pathway	22	0.0254253	1.70276e-07	EGFR, PIK3CG, HRAS, MAP2K1, ERBB4, BRAF, GRB2, CAMK2G, RAF1, MAPK10, SRC, PRKCB, AKT1, PAK6, MAPK1, PTK2, GSK3B, CAMK2D, MAPK8, ABL1, PIK3R1, AKT2	3.76519	4.61438e-05
hsa04610	Complement and coagulation cascades	19	0.0219582	3.76198e-07	KNG1, F11, PLAT, F10, CFB, C1R, BDKRB1, F7, C1S, BDKRB2, PLG, C8G, PROC, FGG, F2, SERPINE1, SERPINA1, CFD, PLAU	4.10004	0.000101944
hsa04920	Adipocytokine signaling pathway	19	0.0219582	4.75564e-07	PPARA, TNF, STK11, RXRB, SOCS3, RXRA, MAPK10, ADIPOQ, PCK1, PTPN11, LEP, AKT1, PRKCQ, CD36, SLC2A4, MAPK8, PRKAA1, JAK2, AKT2	4.04147	0.00012887
hsa04930	Type II diabetes mellitus	15	0.0173354	1.76195e-06	PIK3CG, TNF, SOCS3, SOCS1, HK1, MAPK10, ADIPOQ, MAPK1, GCK, SLC2A4, INS, PKLR, MAPK8, INSR, PIK3R1	4.653	0.000477376
hsa01100	Metabolic pathways	121	0.139839	2.51152e-06	LDHB, ALAD, GNPDA1, GNPDA2, HMGCR, DTYMK, ADH1C, ADH1B, PNP, ITPKA, AGXT, PDHB, SPR, HADH, FECH, GATM, BST1, NME2, NNT, RFK, BHMT, HSD11B1, PLA2G2A, NMNAT1, ALDOA, AHCY, SRM, PAH, PPCDC, ACAT1, TK1, ARG1, TPI1, IVD, ARG2, DHODH, CDA, GALE, AMD1, CYP19A1, GCDH, UAP1, CYP2C9, MAOA, CYP2C8, AK1, MAOB, FDPS, EPHX2, GART, DHFR, ALDH2, ABO, DCXR, DUT, IMPA1, CYP2J2, PNMT, NDST1, HEXB, MAN1B1, LSS, PSPH…	1.47797	0.000680391
hsa04152	AMPK signaling pathway	24	0.0277367	5.41412e-06	PIK3CG, STK11, HMGCR, PFKFB1, PPARG, ELAVL1, IGF1, FOXO1, ADIPOQ, SIRT1, PCK1, LEP, AKT1, IGF1R, PDPK1, CD36, SLC2A4, INS, RHEB, PRKAA1, INSR, CCNA2, PIK3R1, AKT2	2.90529	0.00146615
hsa04668	TNF signaling pathway	22	0.0254253	6.30963e-06	PIK3CG, ICAM1, TNF, CCL2, MAP2K1, SOCS3, MMP9, EDN1, MAPK10, MMP3, CCL5, AKT1, MAPK1, CASP3, MAPK12, CASP7, MAPK14, IL1B, MAPK8, SELE, PIK3R1, AKT2	3.06142	0.00170845
hsa04150	mTOR signaling pathway	15	0.0173354	1.9893e-05	PIK3CG, TNF, BRAF, STK11, IGF1, PRKCB, AKT1, MAPK1, PDPK1, EIF4E, INS, RHEB, PRKAA1, PIK3R1, AKT2	3.85076	0.00537655
hsa04922	Glucagon signaling pathway	20	0.0231139	2.42963e-05	LDHB, PPARA, CAMK2G, PFKFB1, PDE3B, FOXO1, SIRT1, PDHB, PCK1, AKT1, GNAQ, GCK, PYGL, CAMK2D, CALM3, PRKACA, PRKAA1, CALM2, AKT2, CALM1	3.008	0.00656274
hsa04010	MAPK signaling pathway	36	0.041605	2.84296e-05	FGFR2, FGFR1, HRAS, TNF, GRB2, HSPA1A, MAPKAPK2, TGFB2, AKT1, CDC42, CASP3, BDNF, RAC2, RAC1, IL1B, PRKACA, FGF1, HSPA8, AKT2, EGFR, BRAF, MAP2K1, TGFBR1, TGFBR2, TP53, RAF1, MAPK10, PRKCB, MAPK1, MAPK12, DUSP1, MAPK14, MAPK8, GADD45A, DUSP6, PPP5C	2.11868	0.00767493
hsa04620	Toll-like receptor signaling pathway	18	0.0208025	0.000615991	PIK3CG, TNF, MAP2K1, TLR4, MAPK10, STAT1, CCL5, AKT1, MAPK1, CTSK, MAPK12, MAPK14, RAC1, IL1B, MAPK8, PIK3R1, SPP1, AKT2	2.52842	0.153788
hsa04670	Leukocyte transendothelial migration	18	0.0208025	0.00157316	PIK3CG, ICAM1, ITGAL, ITK, MMP9, CTNNA1, MMP2, PRKCB, MYL9, PTPN11, CDC42, PTK2, RAC2, MAPK12, MAPK14, RAC1, RHOA, PIK3R1	2.33055	0.347315
hsa04064	NF-kappa B signaling pathway	14	0.0161797	0.00493196	ICAM1, TNF, XIAP, TLR4, BCL2L1, BTK, PRKCQ, TNFSF11, CSNK2A1, LCK, ZAP70, IL1B, PLAU, SYK	2.39603	0.73812
hsa04115	p53 signaling pathway	11	0.0127126	0.0130302	CASP3, CDKN2A, SERPINE1, TP53, MDM2, IGF1, CHEK1, CDK6, APAF1, GADD45A, CDK2	2.44456	0.971401
